# Supplementary material for: Stability Assessment of Four Chimeric Proteins for Human Chagas Disease Immunodiagnosis
Source: MDPI journal article supplement (doi:10.3390/bios11080289), 2021-08-22
Supplement: s1 [file s1]

## Circular Dichroism (CD) Measurements

| Wavelength<br>(nm) | IBMP-8.1   |              | IBMP-8.2   |              | IBMP-8.3   |              | IBMP-8.4   |              |
|--------------------|------------|--------------|------------|--------------|------------|--------------|------------|--------------|
|                    | Preheating | Post-heating | Preheating | Post-heating | Preheating | Post-heating | Preheating | Post-heating |
| 202                | -27.97013  | -25.97853    | -91.5756   | -78.2799     | -36.6587   | -3.38259     | -26.5874   | -26.9006     |
| 203                | -24.54188  | -23.24018    | -96.4517   | -101.886     | -35.9421   | -3.19263     | -26.6327   | -27.3876     |
| 204                | -22.01187  | -20.68987    | -102.553   | -99.6132     | -34.631    | -3.62961     | -26.6751   | -26.9014     |
| 205                | -19.86683  | -18.46263    | -96.4023   | -103.162     | -33.4646   | -4.17327     | -25.9623   | -25.8974     |
| 206                | -16.6321   | -16.1475     | -94.9932   | -97.0422     | -30.1428   | -4.28723     | -25.0191   | -25.0793     |
| 207                | -15.04768  | -15.51208    | -91.8323   | -90.83       | -27.7089   | -4.09431     | -23.9768   | -23.8166     |
| 208                | -13.52575  | -12.87615    | -88.4071   | -85.0746     | -25.6183   | -4.0586      | -22.3295   | -22.0939     |
| 209                | -10.56511  | -10.56681    | -79.3097   | -79.5211     | -23.8265   | -4.39545     | -20.57     | -19.8563     |
| 210                | -9.305184  | -9.869684    | -75.5253   | -74.4332     | -21.5594   | -4.47324     | -18.9619   | -18.0897     |
| 211                | -7.976234  | -8.078684    | -69.2449   | -66.3727     | -19.2078   | -4.05667     | -17.5119   | -16.7286     |
| 212                | -7.151488  | -6.692618    | -64.0829   | -62.5157     | -17.1061   | -4.03541     | -16.1937   | -15.4203     |
| 213                | -5.790762  | -6.148442    | -62.3679   | -57.7456     | -15.7662   | -4.60156     | -15.3406   | -14.3031     |
| 214                | -4.837254  | -5.608364    | -60.6171   | -56.0939     | -14.8035   | -4.35573     | -14.7916   | -13.8221     |
| 215                | -4.382251  | -4.559431    | -58.3905   | -55.8655     | -13.7702   | -4.27797     | -14.2621   | -13.3884     |
| 216                | -3.639093  | -3.749733    | -57.0566   | -54.4015     | -12.7442   | -4.40531     | -13.8015   | -13.0315     |
| 217                | -3.483388  | -3.581528    | -56.3543   | -53.95       | -11.8938   | -4.47391     | -13.5486   | -12.8941     |
| 218                | -2.867548  | -3.145068    | -57.1802   | -53.5615     | -11.5213   | -4.7132      | -13.5479   | -12.7812     |
| 219                | -2.681349  | -2.592629    | -57.5655   | -53.5026     | -11.1679   | -4.94468     | -13.6792   | -12.7993     |
| 220                | -2.787281  | -2.262941    | -57.354    | -53.2241     | -10.6144   | -4.9751      | -13.6927   | -12.7387     |
| 221                | -2.579022  | -1.891182    | -57.3322   | -52.7008     | -10.4472   | -5.00567     | -13.3903   | -12.5768     |
| 222                | -2.632862  | -2.245902    | -57.085    | -52.7603     | -10.0647   | -4.98418     | -13.2062   | -12.3171     |
| 223                | -2.41908   | -2.14955     | -56.7443   | -52.8708     | -9.8156    | -4.95346     | -12.8953   | -12.453      |

|     |           |           |          |          |          |          |          |          |
|-----|-----------|-----------|----------|----------|----------|----------|----------|----------|
| 224 | -2.351784 | -2.173024 | -55.5553 | -51.7921 | -9.53054 | -4.78289 | -12.6349 | -12.018  |
| 225 | -2.329289 | -2.242849 | -54.0074 | -49.7915 | -8.80413 | -4.92819 | -12.206  | -11.4102 |
| 226 | -2.093682 | -2.239682 | -51.6285 | -47.4799 | -8.3192  | -4.68455 | -11.5215 | -10.7103 |
| 227 | -2.320894 | -2.083544 | -48.7901 | -45.0799 | -7.74391 | -4.44168 | -10.7722 | -10.0756 |
| 228 | -2.119794 | -2.036674 | -45.6736 | -42.1849 | -7.19263 | -3.96891 | -9.99317 | -9.10003 |
| 229 | -1.878951 | -1.986711 | -41.8409 | -38.7435 | -6.58049 | -3.85226 | -8.97203 | -8.26187 |
| 230 | -1.686606 | -1.856686 | -37.8996 | -34.9024 | -5.72122 | -3.67541 | -7.95412 | -7.32698 |
| 231 | -1.439307 | -1.623467 | -33.6667 | -31.0525 | -4.68428 | -3.21976 | -6.95349 | -6.48675 |
| 232 | -1.493073 | -1.508533 | -29.8521 | -27.425  | -4.13042 | -2.5174  | -5.85922 | -5.6788  |
| 233 | -1.209538 | -1.422368 | -26.1767 | -23.8071 | -3.50015 | -2.24303 | -4.74324 | -4.89359 |
| 234 | -1.05638  | -1.36933  | -22.3053 | -20.4232 | -2.89223 | -1.90696 | -3.99586 | -4.17189 |
| 235 | -0.997638 | -1.075638 | -18.8895 | -17.2385 | -2.42992 | -1.38961 | -3.37402 | -3.26231 |
| 236 | -0.977393 | -1.031733 | -15.9468 | -14.2302 | -2.13414 | -1.07402 | -2.65314 | -2.50525 |
| 237 | -0.625726 | -0.833646 | -13.0026 | -11.7438 | -1.75557 | -0.88587 | -1.95443 | -2.01386 |
| 238 | -0.528288 | -0.641218 | -10.4322 | -9.63963 | -1.35974 | -0.80377 | -1.56866 | -1.58942 |
| 239 | -0.64198  | -0.62988  | -8.56131 | -7.76363 | -1.08464 | -0.61211 | -1.22489 | -1.18204 |
| 240 | -0.55298  | -0.65311  | -6.98277 | -6.13522 | -0.71008 | -0.43066 | -0.83796 | -0.93186 |
| 241 | -0.355128 | -0.571419 | -5.47755 | -4.7611  | -0.34507 | -0.31294 | -0.62773 | -0.7473  |
| 242 | -0.085212 | -0.295631 | -4.16836 | -3.65132 | -0.18711 | -0.10174 | -0.47856 | -0.53066 |
| 243 | -0.143813 | -0.205337 | -3.15634 | -2.63347 | -0.10394 | 0.043687 | -0.23193 | -0.37215 |
| 244 | -0.048221 | -0.087314 | -2.47054 | -2.17503 | 0.099468 | 0.126217 | -0.14772 | -0.31409 |
| 245 | 0.043654  | -0.134019 | -1.54143 | -1.72224 | 0.060194 | 0.078276 | -0.00566 | -0.18929 |
| 246 | -0.043568 | -0.182423 | -1.06941 | -0.99877 | -0.0476  | 0.196376 | 0.137935 | -0.11391 |
| 247 | -0.054866 | -0.145671 | -0.61105 | -0.55526 | 0.132619 | 0.287938 | 0.297124 | 0.060513 |
| 248 | 0.037066  | -0.149854 | -0.33784 | -0.3117  | 0.284396 | 0.321521 | 0.212932 | 0.018733 |
| 249 | 0.251396  | -0.028694 | -0.15049 | -0.0019  | 0.330269 | 0.04026  | 0.176231 | -0.0183  |
| 250 | 0.222026  | -0.071003 | 0.244411 | 0.098598 | 0.415874 | -0.0824  | 0.141399 | 0.159519 |

|     |          |          |          |          |          |          |          |          |
|-----|----------|----------|----------|----------|----------|----------|----------|----------|
| 251 | 0.124874 | 0.023677 | 0.23936  | 0.086574 | 0.466899 | 0.135677 | 0.251583 | 0.18906  |
| 252 | 0.031567 | 0.139584 | 0.22813  | 0.311596 | 0.579922 | 0.259457 | 0.354977 | 0.260036 |
| 253 | 0.274036 | 0.211353 | 0.344608 | 0.296131 | 0.487461 | 0.235889 | 0.415493 | 0.198192 |
| 254 | 0.292236 | 0.175582 | 0.337005 | 0.469726 | 0.453903 | 0.215728 | 0.392654 | 0.208671 |
| 255 | 0.158212 | 0.143503 | 0.378626 | 0.58082  | 0.470621 | 0.450723 | 0.433244 | 0.22455  |
| 256 | 0.289228 | 0.240293 | 0.599439 | 0.547773 | 0.364759 | 0.337552 | 0.492635 | 0.218725 |
| 257 | 0.245775 | 0.175798 | 0.555253 | 0.591417 | 0.431581 | 0.224992 | 0.606157 | 0.228448 |
| 258 | 0.138204 | 0.192342 | 0.526571 | 0.522024 | 0.29981  | 0.421667 | 0.460394 | 0.209699 |
| 259 | 0.144018 | 0.274618 | 0.593176 | 0.475088 | 0.567556 | 0.33959  | 0.452093 | 0.290418 |
| 260 | 0.263287 | 0.411648 | 0.754437 | 0.766827 | 0.698849 | 0.308666 | 0.536869 | 0.267544 |

## Dynamic Light Scattering (DLS)

| Radius (nm) | IBMP-8.1   |              | IBMP-8.2   |              | IBMP-8.3   |              | IBMP-8.4   |              |
|-------------|------------|--------------|------------|--------------|------------|--------------|------------|--------------|
|             | Preheating | Post-heating | Preheating | Post-heating | Preheating | Post-heating | Preheating | Post-heating |
| 0.0260057   | 0          | 0            | 0          | 0            | 0          | 0            | 0          | 0            |
| 0.0329794   | 0          | 0            | 0          | 0            | 0          | 0            | 0          | 0            |
| 0.0418231   | 0          | 0            | 0          | 0            | 0          | 0            | 0          | 0            |
| 0.0530384   | 0          | 0            | 0          | 0            | 0          | 0            | 0          | 0            |
| 0.0672611   | 0          | 0            | 0          | 0            | 0          | 0            | 0          | 0            |
| 0.0852978   | 0          | 0            | 0          | 0            | 0          | 0            | 0          | 0            |
| 0.108171    | 0          | 0            | 0          | 0            | 0          | 0            | 0          | 0            |
| 0.137178    | 0          | 0            | 0          | 0            | 0          | 0            | 0          | 0            |
| 0.173964    | 0          | 0            | 0          | 0            | 0          | 0            | 0          | 0            |
| 0.220614    | 0          | 0            | 0          | 0            | 0          | 0            | 0          | 0            |
| 0.279774    | 0          | 0            | 0          | 0            | 0          | 0            | 0          | 0            |
| 0.354797    | 0          | 0            | 0          | 0            | 0          | 0            | 0          | 0            |
| 0.44994     | 0          | 0            | 0          | 0            | 0          | 0            | 0          | 0            |
| 0.570595    | 0          | 0            | 0          | 0            | 0          | 0            | 0          | 0            |
| 0.723605    | 0          | 0            | 0          | 0            | 0          | 0            | 0          | 0            |
| 0.917647    | 0          | 0            | 0          | 0            | 0          | 0            | 0          | 0            |
| 1.16372     | 0          | 0            | 0          | 0            | 0          | 0            | 0          | 0            |
| 1.47579     | 0          | 0            | 0          | 0            | 0          | 0            | 0          | 0            |
| 1.87153     | 5.4047     | 0            | 0          | 0            | 0          | 0            | 0          | 0            |
| 2.3734      | 83.0882    | 48.8947      | 0.405836   | 0            | 0          | 0            | 0          | 0            |
| 3.00985     | 30.4137    | 3.32702      | 44.7228    | 0            | 9.71305    | 0            | 21.3563    | 24.5768      |
| 3.81697     | 9.25165    | 0            | 35.212     | 0            | 55.3663    | 42.9181      | 34.0492    | 32.0724      |

|         |         |   |          |         |          |          |           |           |
|---------|---------|---|----------|---------|----------|----------|-----------|-----------|
| 4.84052 | 1.49334 | 0 | 15.2969  | 0       | 27.5309  | 35.6311  | 22.6861   | 20.6111   |
| 6.13855 | 0       | 0 | 3.89654  | 0       | 0        | 0        | 10.1386   | 9.21134   |
| 7.78466 | 0       | 0 | 0.251547 | 0       | 0        | 0        | 3.27583   | 3.02907   |
| 9.87219 | 0       | 0 | 0        | 0       | 0        | 0        | 0.677972  | 0.655435  |
| 12.5195 | 0       | 0 | 0        | 4.73424 | 0        | 0        | 0.0318219 | 0.0429102 |
| 15.8767 | 0       | 0 | 0        | 0       | 0        | 0        | 0         | 0         |
| 20.1342 | 0       | 0 | 0        | 0       | 0        | 0        | 0         | 0         |
| 25.5334 | 0       | 0 | 0        | 0       | 0        | 0        | 0         | 0         |
| 32.3804 | 0       | 0 | 0        | 0       | 0        | 0        | 0         | 0         |
| 41.0635 | 0       | 0 | 0        | 0       | 0        | 0        | 0         | 0         |
| 52.0751 | 0       | 0 | 0        | 0       | 0        | 0        | 0         | 0         |
| 66.0395 | 0       | 0 | 0        | 0       | 0        | 0        | 0         | 0         |
| 83.7486 | 0       | 0 | 0        | 0       | 0        | 0        | 0         | 0         |
| 106.207 | 0       | 0 | 0        | 0       | 0        | 0        | 0         | 0         |
| 134.687 | 0       | 0 | 0        | 0       | 0        | 0        | 0         | 0         |
| 170.804 | 0       | 0 | 0        | 0       | 0        | 0        | 0         | 0         |
| 216.607 | 0       | 0 | 0        | 0       | 0        | 0        | 0         | 0         |
| 274.692 | 0       | 0 | 0        | 0       | 0        | 0        | 0         | 0         |
| 348.354 | 0       | 0 | 0        | 0       | 0        | 0        | 0         | 0         |
| 441.768 | 0       | 0 | 0        | 0       | 0        | 0        | 0         | 0         |
| 560.232 | 0       | 0 | 0        | 0       | 0        | 0        | 0         | 0         |
| 710.463 | 0       | 0 | 0        | 0       | 0        | 0        | 0         | 0         |
| 900.981 | 0       | 0 | 0        | 0       | 0        | 0        | 0         | 0         |
| 1142.59 | 0       | 0 | 0        | 0       | 0        | 0        | 0         | 0         |
| 1448.98 | 0       | 0 | 0        | 0       | 0.284396 | 0.321521 | 0         | 0         |
| 1837.54 | 0       | 0 | 0        | 0       | 0.330269 | 0.04026  | 0         | 0         |
| 2330.29 | 0       | 0 | 0        | 0       | 0.415874 | -0.0824  | 0         | 0         |

|         |   |          |            |          |          |          |   |   |
|---------|---|----------|------------|----------|----------|----------|---|---|
| 2955.18 | 0 | 0        | 0          | 0        | 0.466899 | 0.135677 | 0 | 0 |
| 3747.64 | 0 | 0        | 0          | 0        | 0.579922 | 0.259457 | 0 | 0 |
| 4752.61 | 0 | 0        | 0.00135379 | 0        | 0.487461 | 0.235889 | 0 | 0 |
| 6027.06 | 0 | 0        | 0.0100637  | 0        | 0.453903 | 0.215728 | 0 | 0 |
| 7643.28 | 0 | 0        | 0.0433948  | 0        | 0.470621 | 0.450723 | 0 | 0 |
| 9692.89 | 0 | 0        | 0.0363213  | 0        | 0.364759 | 0.337552 | 0 | 0 |
| 12292.1 | 0 | 0        | 0          | 0        | 0.431581 | 0.224992 | 0 | 0 |
| 15588.4 | 0 | 0.192342 | 0.526571   | 0.522024 | 0.29981  | 0.421667 | 0 | 0 |
| 19768.5 | 0 | 0.274618 | 0.593176   | 0.475088 | 0.567556 | 0.33959  | 0 | 0 |

## Indirect ELISA

| Samples                               | IBMP-8.1               |      |      |      | IBMP-8.2               |      |      |      | IBMP-8.3               |      |      |      | IBMP-8.4               |      |      |      |
|---------------------------------------|------------------------|------|------|------|------------------------|------|------|------|------------------------|------|------|------|------------------------|------|------|------|
|                                       | Time of exposure (min) |      |      |      | Time of exposure (min) |      |      |      | Time of exposure (min) |      |      |      | Time of exposure (min) |      |      |      |
|                                       | 0                      | 1    | 10   | 20   | 0                      | 1    | 10   | 20   | 0                      | 1    | 10   | 20   | 0                      | 1    | 10   | 20   |
| <i>Trypanosoma cruzi</i> -negative 01 | 0.42                   | 0.43 | 0.44 | 0.26 | 0.27                   | 0.43 | 0.34 | 0.36 | 0.57                   | 0.29 | 0.53 | 0.22 | 0.56                   | 0.44 | 0.44 | 0.41 |
| <i>Trypanosoma cruzi</i> -negative 02 | 0.27                   | 0.27 | 0.08 | 0.19 | 0.21                   | 0.31 | 0.19 | 0.17 | 0.21                   | 0.4  | 0.15 | 0.07 | 0.18                   | 0.14 | 0.26 | 0.15 |
| <i>Trypanosoma cruzi</i> -negative 03 | 0.35                   | 0.39 | 0.5  | 0.61 | 0.26                   | 0.28 | 0.34 | 0.18 | 0.36                   | 0.44 | 0.22 | 0.1  | 0.75                   | 0.78 | 0.37 | 0.28 |
| <i>Trypanosoma cruzi</i> -negative 04 | 0.23                   | 0.22 | 0.1  | 0.21 | 0.7                    | 0.26 | 0.56 | 0.33 | 0.2                    | 0.21 | 0.09 | 0.05 | 0.2                    | 0.12 | 0.2  | 0.14 |
| <i>Trypanosoma cruzi</i> -negative 05 | 0.23                   | 0.28 | 0.16 | 0.2  | 0.46                   | 0.31 | 0.19 | 0.39 | 0.2                    | 0.26 | 0.31 | 0.56 | 0.85                   | 0.99 | 0.24 | 0.13 |
| <i>Trypanosoma cruzi</i> -negative 06 | 0.39                   | 0.3  | 0.26 | 0.33 | 0.23                   | 0.42 | 0.24 | 0.22 | 0.26                   | 0.24 | 0.23 | 0.12 | 0.3                    | 0.21 | 0.25 | 0.34 |
| <i>Trypanosoma cruzi</i> -negative 07 | 0.25                   | 0.44 | 0.46 | 0.43 | 0.23                   | 0.3  | 0.26 | 0.26 | 0.2                    | 0.21 | 0.12 | 0.07 | 0.27                   | 0.17 | 0.24 | 0.16 |
| <i>Trypanosoma cruzi</i> -negative 08 | 0.25                   | 0.31 | 0.27 | 0.24 | 0.29                   | 0.31 | 0.23 | 0.25 | 0.19                   | 0.22 | 0.31 | 0.15 | 0.27                   | 0.23 | 0.22 | 0.15 |
| <i>Trypanosoma cruzi</i> -negative 09 | 0.32                   | 0.33 | 0.52 | 0.3  | 0.33                   | 0.32 | 0.86 | 0.48 | 0.23                   | 0.32 | 0.16 | 0.09 | 0.22                   | 0.19 | 0.28 | 0.17 |
| <i>Trypanosoma cruzi</i> -negative 10 | 0.46                   | 0.45 | 0.34 | 0.32 | 0.26                   | 0.3  | 0.35 | 0.24 | 0.2                    | 0.27 | 0.22 | 0.1  | 0.3                    | 0.31 | 0.36 | 0.43 |
| <i>Trypanosoma cruzi</i> -negative 11 | 0.28                   | 0.34 | 0.46 | 0.38 | 0.33                   | 0.41 | 0.28 | 0.24 | 0.24                   | 0.29 | 0.23 | 0.12 | 0.2                    | 0.41 | 0.5  | 0.29 |
| <i>Trypanosoma cruzi</i> -negative 12 | 0.26                   | 0.26 | 0.44 | 0.47 | 0.38                   | 0.4  | 0.24 | 0.22 | 0.22                   | 0.23 | 0.19 | 0.08 | 0.2                    | 0.16 | 0.27 | 0.21 |
| <i>Trypanosoma cruzi</i> -negative 13 | 0.52                   | 0.59 | 0.45 | 0.53 | 0.26                   | 0.35 | 0.44 | 0.31 | 0.43                   | 0.33 | 0.29 | 0.14 | 0.33                   | 0.3  | 0.44 | 0.32 |
| <i>Trypanosoma cruzi</i> -negative 14 | 0.24                   | 0.26 | 0.45 | 0.28 | 0.45                   | 0.35 | 0.18 | 0.48 | 0.2                    | 0.3  | 0.11 | 0.06 | 0.16                   | 0.15 | 0.23 | 0.15 |
| <i>Trypanosoma cruzi</i> -negative 15 | 0.27                   | 0.27 | 0.49 | 0.43 | 0.25                   | 0.36 | 0.88 | 0.18 | 0.22                   | 0.21 | 0.15 | 0.08 | 0.21                   | 0.15 | 0.21 | 0.17 |
| <i>Trypanosoma cruzi</i> -negative 16 | 0.26                   | 0.26 | 0.11 | 0.33 | 0.5                    | 0.36 | 0.21 | 0.59 | 0.23                   | 0.29 | 0.19 | 0.1  | 0.18                   | 0.17 | 0.25 | 0.18 |
| <i>Trypanosoma cruzi</i> -negative 17 | 0.27                   | 0.3  | 0.11 | 0.24 | 0.3                    | 0.32 | 0.22 | 0.32 | 0.21                   | 0.25 | 0.23 | 0.11 | 0.28                   | 0.25 | 0.24 | 0.24 |
| <i>Trypanosoma cruzi</i> -negative 18 | 0.23                   | 0.31 | 0.46 | 0.24 | 0.25                   | 0.28 | 0.82 | 0.27 | 0.2                    | 0.4  | 0.13 | 0.07 | 0.21                   | 0.17 | 0.2  | 0.14 |
| <i>Trypanosoma cruzi</i> -negative 19 | 0.17                   | 0.16 | 0.31 | 0.17 | 0.42                   | 0.39 | 0.81 | 0.34 | 0.16                   | 0.19 | 0.07 | 0.06 | 0.18                   | 0.18 | 0.16 | 0.13 |
| <i>Trypanosoma cruzi</i> -negative 20 | 0.3                    | 0.3  | 0.45 | 0.4  | 0.24                   | 0.43 | 0.18 | 0.29 | 0.46                   | 0.28 | 0.1  | 0.08 | 0.18                   | 0.18 | 0.2  | 0.22 |

|                                       |      |      |      |      |      |      |      |      |      |      |      |      |      |      |      |      |
|---------------------------------------|------|------|------|------|------|------|------|------|------|------|------|------|------|------|------|------|
| <i>Trypanosoma cruzi</i> -negative 21 | 0.31 | 0.34 | 0.52 | 0.54 | 0.44 | 0.38 | 0.23 | 0.48 | 0.24 | 0.38 | 0.17 | 0.1  | 0.22 | 0.24 | 0.29 | 0.23 |
| <i>Trypanosoma cruzi</i> -negative 22 | 0.24 | 0.28 | 0.45 | 0.21 | 0.19 | 0.32 | 0.79 | 0.2  | 0.19 | 0.23 | 0.08 | 0.07 | 0.21 | 0.22 | 0.16 | 0.13 |
| <i>Trypanosoma cruzi</i> -positive 01 | 1.24 | 1.13 | 0.62 | 0.62 | 5.13 | 5.85 | 9.03 | 5.99 | 1.23 | 1.15 | 0.89 | 0.36 | 1.05 | 0.83 | 0.92 | 0.89 |
| <i>Trypanosoma cruzi</i> -positive 02 | 4.44 | 4.29 | 3.52 | 2.25 | 3.37 | 3.94 | 5.24 | 4.43 | 3.93 | 4.11 | 4.69 | 3.4  | 3.61 | 2.99 | 7.5  | 4.52 |
| <i>Trypanosoma cruzi</i> -positive 03 | 5.54 | 5.63 | 4.73 | 2.18 | 2.35 | 3.27 | 2.6  | 2.9  | 3.82 | 4.48 | 1.08 | 3.14 | 3.42 | 3    | 6.76 | 5.64 |
| <i>Trypanosoma cruzi</i> -positive 04 | 3.61 | 3.6  | 2.63 | 1.75 | 1.69 | 3.01 | 1.44 | 1.67 | 2.95 | 3.4  | 2.07 | 2.53 | 2.87 | 2.66 | 3.87 | 3.92 |
| <i>Trypanosoma cruzi</i> -positive 05 | 2.76 | 2.64 | 1.86 | 1.25 | 3.67 | 4.26 | 4.54 | 3.16 | 3.04 | 3.66 | 2.03 | 2.82 | 3.26 | 2.69 | 4.38 | 4.38 |
| <i>Trypanosoma cruzi</i> -positive 06 | 3.25 | 3.17 | 0.76 | 1.01 | 3.24 | 4.25 | 4.89 | 4.03 | 3.08 | 3.62 | 5.48 | 2.33 | 2.91 | 2.67 | 4.74 | 4.36 |
| <i>Trypanosoma cruzi</i> -positive 07 | 3.36 | 2.92 | 1.94 | 1.46 | 2.72 | 3.25 | 3.38 | 3.7  | 3.08 | 3.31 | 6.8  | 3.17 | 3.41 | 2.94 | 4.54 | 4.91 |
| <i>Trypanosoma cruzi</i> -positive 08 | 3.31 | 3.55 | 3.83 | 1.24 | 2.15 | 2.47 | 1.98 | 2.24 | 3.34 | 4.05 | 2.25 | 3.09 | 3.3  | 3    | 5.77 | 4.72 |
| <i>Trypanosoma cruzi</i> -positive 09 | 2.85 | 2.56 | 1.47 | 3.05 | 4.65 | 5.66 | 7.41 | 6.51 | 2.46 | 2.69 | 6.91 | 3.19 | 3.29 | 2.83 | 2.9  | 3.04 |
| <i>Trypanosoma cruzi</i> -positive 10 | 3.32 | 3.09 | 1.77 | 2.97 | 3.62 | 4.4  | 4.62 | 3.72 | 2.7  | 3.16 | 6.55 | 2.95 | 3.04 | 2.73 | 3.77 | 3.34 |
| <i>Trypanosoma cruzi</i> -positive 11 | 2.96 | 3.27 | 1.49 | 1.18 | 2.32 | 2.75 | 2.76 | 3.38 | 2.49 | 2.95 | 2.95 | 1.23 | 2    | 1.69 | 3.45 | 2.57 |
| <i>Trypanosoma cruzi</i> -positive 12 | 2.77 | 2.88 | 1.57 | 2.69 | 1.49 | 2    | 1.42 | 1.39 | 2.51 | 2.99 | 5.35 | 2.36 | 2.84 | 2.59 | 3.04 | 2.85 |
| <i>Trypanosoma cruzi</i> -positive 13 | 1.61 | 1.44 | 0.91 | 0.92 | 4.78 | 5.53 | 7.46 | 6.61 | 2.07 | 2.39 | 5.79 | 2.7  | 2.98 | 2.73 | 2.36 | 2.34 |
| <i>Trypanosoma cruzi</i> -positive 14 | 3.55 | 3.58 | 2.02 | 2.82 | 2.49 | 3.15 | 3.36 | 3.57 | 2.96 | 3.52 | 5.66 | 2.37 | 2.94 | 2.69 | 4.18 | 3.87 |
| <i>Trypanosoma cruzi</i> -positive 15 | 3.55 | 3.86 | 2.74 | 1.73 | 3.58 | 4.97 | 5.56 | 4.49 | 2.92 | 3.44 | 1.37 | 3.54 | 3.49 | 3.14 | 4.35 | 3.33 |
| <i>Trypanosoma cruzi</i> -positive 16 | 5.13 | 5.55 | 4.97 | 2.29 | 3.45 | 5.11 | 4.88 | 2.99 | 4.17 | 5.11 | 2.45 | 2.89 | 3.23 | 2.87 | 8.37 | 7.16 |
| <i>Trypanosoma cruzi</i> -positive 17 | 2.27 | 2.39 | 1.21 | 2.24 | 2.63 | 3.11 | 2.92 | 2.41 | 1.93 | 2.09 | 3.54 | 1.7  | 2.33 | 2.13 | 1.87 | 2    |
| <i>Trypanosoma cruzi</i> -positive 18 | 3.1  | 2.73 | 1    | 1.92 | 4.68 | 5.68 | 8.24 | 6.1  | 2.78 | 3.44 | 2    | 3.34 | 3.32 | 3.08 | 4    | 3.96 |
| <i>Trypanosoma cruzi</i> -positive 19 | 2.76 | 2.99 | 1.49 | 0.83 | 1    | 1.04 | 0.74 | 0.67 | 2.47 | 3.22 | 2.12 | 2.88 | 2.99 | 2.79 | 3.34 | 3.37 |
| <i>Trypanosoma cruzi</i> -positive 20 | 1.57 | 2.25 | 0.65 | 1.22 | 3.35 | 4.15 | 5.02 | 4.69 | 2    | 3.44 | 2.49 | 1.2  | 1.87 | 2    | 2.35 | 2.33 |
| <i>Trypanosoma cruzi</i> -positive 21 | 2.83 | 2.93 | 0.99 | 2.69 | 1.8  | 2.28 | 1.83 | 1.88 | 2.7  | 2.99 | 5.31 | 2.77 | 2.93 | 2.82 | 2.65 | 2.94 |
| <i>Trypanosoma cruzi</i> -positive 22 | 2.43 | 2.52 | 0.83 | 2.32 | 2.24 | 2.8  | 2.84 | 2.76 | 3.15 | 3.95 | 2.34 | 2.97 | 3.37 | 3.17 | 4.73 | 4.14 |



## Circular Dichroism (CD) Measurements

| Wavelength<br>(nm) | IBMP-8.1                 |         |         |         | IBMP-8.2                 |         |         |         | IBMP-8.3                 |         |         |         | IBMP-8.4                 |         |         |         |
|--------------------|--------------------------|---------|---------|---------|--------------------------|---------|---------|---------|--------------------------|---------|---------|---------|--------------------------|---------|---------|---------|
|                    | Time of exposure (hours) |         |         |         | Time of exposure (hours) |         |         |         | Time of exposure (hours) |         |         |         | Time of exposure (hours) |         |         |         |
|                    | 0                        | 24      | 48      | 72      | 0                        | 24      | 48      | 72      | 0                        | 24      | 48      | 72      | 0                        | 24      | 48      | 72      |
| 193                | -21.981                  | -21.790 | -19.844 | -18.598 | No data                  | No data | No data | No data | -31.343                  | -29.538 | -27.606 | -32.730 | 0.005                    | -3.955  | -1.244  | -3.994  |
| 193,5              | -22.512                  | -21.841 | -20.540 | -18.962 | No data                  | No data | No data | No data | -32.533                  | -31.931 | -29.096 | -33.158 | -1.575                   | -4.959  | -2.622  | -4.842  |
| 194                | -22.997                  | -22.018 | -21.379 | -19.336 | No data                  | No data | No data | No data | -34.603                  | -34.602 | -31.164 | -33.929 | -3.428                   | -6.064  | -4.275  | -6.200  |
| 194,5              | -23.624                  | -22.321 | -22.281 | -20.035 | No data                  | No data | No data | No data | -37.004                  | -37.466 | -33.475 | -35.323 | -5.727                   | -7.639  | -6.406  | -7.803  |
| 195                | -24.114                  | -23.034 | -22.986 | -20.981 | -5.280                   | -4.141  | 0.410   | 0.358   | -39.055                  | -39.185 | -35.288 | -36.925 | -7.745                   | -9.048  | -8.490  | -9.547  |
| 195,5              | -24.545                  | -23.559 | -23.501 | -21.951 | -10.888                  | -7.368  | -3.148  | -3.812  | -41.296                  | -40.886 | -37.589 | -38.760 | -9.914                   | -10.691 | -9.641  | -11.286 |
| 196                | -25.085                  | -24.444 | -23.903 | -22.805 | -17.173                  | -11.681 | -7.671  | -8.929  | -44.066                  | -42.556 | -40.091 | -41.350 | -12.006                  | -12.494 | -11.406 | -12.991 |
| 196,5              | -25.745                  | -25.065 | -24.244 | -23.744 | -21.756                  | -16.915 | -13.475 | -15.004 | -46.268                  | -44.340 | -42.283 | -43.865 | -14.129                  | -14.542 | -13.250 | -14.448 |
| 197                | -26.148                  | -25.547 | -24.583 | -24.326 | -25.369                  | -22.146 | -18.844 | -20.524 | -48.172                  | -45.999 | -44.777 | -45.663 | -16.101                  | -16.322 | -15.089 | -15.893 |
| 197,5              | -26.393                  | -25.701 | -24.904 | -24.677 | -28.458                  | -27.212 | -24.281 | -25.257 | -49.576                  | -47.673 | -46.803 | -46.990 | -17.748                  | -17.713 | -16.735 | -17.151 |
| 198                | -26.332                  | -25.817 | -25.103 | -24.663 | -31.530                  | -31.761 | -29.337 | -29.472 | -51.231                  | -48.994 | -48.708 | -48.023 | -19.265                  | -18.858 | -18.074 | -18.323 |
| 198,5              | -26.120                  | -25.863 | -25.096 | -24.535 | -35.121                  | -35.790 | -33.958 | -33.330 | -52.488                  | -49.978 | -50.108 | -48.574 | -20.504                  | -19.918 | -19.175 | -19.265 |
| 199                | -25.625                  | -25.840 | -24.882 | -24.261 | -38.292                  | -39.345 | -37.441 | -36.623 | -53.437                  | -50.719 | -51.110 | -49.029 | -21.520                  | -20.814 | -20.228 | -20.063 |
| 199,5              | -25.069                  | -25.639 | -24.480 | -23.916 | -41.469                  | -42.328 | -39.959 | -39.629 | -54.191                  | -51.419 | -51.467 | -49.556 | -22.335                  | -21.661 | -21.133 | -20.801 |
| 200                | -24.281                  | -25.128 | -23.918 | -23.508 | -44.184                  | -44.729 | -41.764 | -41.924 | -54.428                  | -51.877 | -51.285 | -49.807 | -22.965                  | -22.371 | -21.840 | -21.427 |
| 200,5              | -23.444                  | -24.321 | -23.275 | -23.107 | -46.446                  | -46.627 | -43.316 | -43.775 | -54.086                  | -52.130 | -50.789 | -49.878 | -23.475                  | -22.925 | -22.294 | -21.935 |
| 201                | -22.493                  | -23.307 | -22.580 | -22.527 | -48.097                  | -48.118 | -44.676 | -45.131 | -53.376                  | -52.002 | -50.084 | -49.658 | -23.743                  | -23.255 | -22.473 | -22.220 |
| 201,5              | -21.736                  | -22.341 | -21.873 | -21.762 | -49.419                  | -49.257 | -46.141 | -46.303 | -52.493                  | -51.557 | -49.519 | -49.207 | -23.932                  | -23.347 | -22.569 | -22.346 |
| 202                | -21.018                  | -21.517 | -21.153 | -20.885 | -50.422                  | -50.068 | -47.622 | -47.333 | -51.569                  | -50.839 | -48.971 | -48.527 | -23.947                  | -23.263 | -22.479 | -22.252 |
| 202,5              | -20.399                  | -20.742 | -20.429 | -19.977 | -51.324                  | -50.549 | -48.683 | -48.188 | -50.634                  | -49.867 | -48.546 | -47.899 | -23.879                  | -23.048 | -22.345 | -22.016 |
| 203                | -19.603                  | -19.958 | -19.685 | -19.093 | -51.864                  | -50.713 | -49.305 | -48.630 | -49.488                  | -48.624 | -47.828 | -46.866 | -23.608                  | -22.778 | -22.117 | -21.622 |

|       |         |         |         |         |         |         |         |         |         |         |         |         |         |         |         |         |
|-------|---------|---------|---------|---------|---------|---------|---------|---------|---------|---------|---------|---------|---------|---------|---------|---------|
| 203,5 | -18.840 | -19.168 | -18.927 | -18.287 | -52.009 | -50.668 | -49.511 | -48.878 | -48.379 | -47.320 | -46.948 | -45.686 | -23.251 | -22.473 | -21.871 | -21.196 |
| 204   | -17.937 | -18.396 | -18.120 | -17.563 | -51.878 | -50.458 | -49.471 | -48.759 | -47.063 | -45.977 | -45.791 | -44.164 | -22.851 | -22.096 | -21.550 | -20.787 |
| 204,5 | -17.049 | -17.481 | -17.271 | -16.860 | -51.531 | -50.148 | -49.190 | -48.430 | -45.604 | -44.603 | -44.414 | -42.599 | -22.400 | -21.633 | -21.205 | -20.376 |
| 205   | -16.119 | -16.524 | -16.373 | -16.058 | -51.004 | -49.720 | -48.879 | -47.849 | -44.002 | -43.217 | -42.933 | -40.905 | -21.891 | -21.121 | -20.726 | -19.956 |
| 205,5 | -15.242 | -15.554 | -15.450 | -15.078 | -50.281 | -49.160 | -48.374 | -47.053 | -42.324 | -41.765 | -41.416 | -39.214 | -21.344 | -20.549 | -20.166 | -19.471 |
| 206   | -14.294 | -14.565 | -14.514 | -14.023 | -49.434 | -48.406 | -47.744 | -46.071 | -40.448 | -40.163 | -39.836 | -37.508 | -20.733 | -19.939 | -19.509 | -18.919 |
| 206,5 | -13.355 | -13.548 | -13.597 | -12.941 | -48.378 | -47.459 | -46.826 | -44.934 | -38.583 | -38.441 | -38.113 | -35.850 | -19.979 | -19.308 | -18.780 | -18.217 |
| 207   | -12.399 | -12.557 | -12.711 | -11.929 | -47.132 | -46.324 | -45.722 | -43.629 | -36.725 | -36.602 | -36.253 | -34.159 | -19.231 | -18.632 | -17.997 | -17.396 |
| 207,5 | -11.521 | -11.652 | -11.865 | -11.023 | -45.781 | -45.066 | -44.425 | -42.276 | -34.932 | -34.820 | -34.305 | -32.471 | -18.466 | -17.918 | -17.244 | -16.551 |
| 208   | -10.712 | -10.879 | -11.064 | -10.280 | -44.379 | -43.727 | -42.989 | -40.894 | -33.219 | -33.030 | -32.425 | -30.918 | -17.738 | -17.178 | -16.506 | -15.772 |
| 208,5 | -9.965  | -10.202 | -10.299 | -9.657  | -42.942 | -42.342 | -41.415 | -39.507 | -31.508 | -31.309 | -30.623 | -29.455 | -16.995 | -16.372 | -15.789 | -15.041 |
| 209   | -9.253  | -9.555  | -9.576  | -9.145  | -41.478 | -40.931 | -39.851 | -38.117 | -29.836 | -29.604 | -28.958 | -28.076 | -16.269 | -15.529 | -15.062 | -14.374 |
| 209,5 | -8.551  | -8.919  | -8.892  | -8.634  | -40.070 | -39.506 | -38.331 | -36.729 | -28.219 | -28.011 | -27.419 | -26.689 | -15.537 | -14.683 | -14.370 | -13.720 |
| 210   | -7.934  | -8.259  | -8.276  | -8.095  | -38.714 | -38.087 | -36.951 | -35.335 | -26.687 | -26.430 | -25.976 | -25.259 | -14.839 | -13.908 | -13.694 | -13.096 |
| 210,5 | -7.412  | -7.591  | -7.730  | -7.513  | -37.377 | -36.717 | -35.704 | -33.992 | -25.205 | -24.973 | -24.546 | -23.833 | -14.142 | -13.243 | -13.048 | -12.484 |
| 211   | -6.963  | -6.988  | -7.265  | -6.909  | -36.103 | -35.434 | -34.554 | -32.759 | -23.799 | -23.556 | -23.165 | -22.419 | -13.489 | -12.703 | -12.454 | -11.932 |
| 211,5 | -6.525  | -6.465  | -6.853  | -6.330  | -34.914 | -34.273 | -33.496 | -31.697 | -22.488 | -22.232 | -21.859 | -21.092 | -12.909 | -12.263 | -11.941 | -11.435 |
| 212   | -6.125  | -6.034  | -6.482  | -5.803  | -33.820 | -33.256 | -32.511 | -30.763 | -21.213 | -20.978 | -20.662 | -19.900 | -12.370 | -11.883 | -11.496 | -11.015 |
| 212,5 | -5.708  | -5.677  | -6.124  | -5.387  | -32.810 | -32.388 | -31.579 | -29.963 | -20.003 | -19.873 | -19.558 | -18.846 | -11.885 | -11.512 | -11.117 | -10.635 |
| 213   | -5.303  | -5.372  | -5.767  | -5.046  | -31.976 | -31.650 | -30.829 | -29.301 | -18.865 | -18.864 | -18.532 | -17.921 | -11.464 | -11.137 | -10.825 | -10.326 |
| 213,5 | -4.954  | -5.062  | -5.417  | -4.776  | -31.273 | -31.025 | -30.244 | -28.775 | -17.872 | -17.936 | -17.569 | -17.061 | -11.106 | -10.761 | -10.562 | -10.039 |
| 214   | -4.605  | -4.724  | -5.084  | -4.458  | -30.759 | -30.495 | -29.750 | -28.335 | -16.979 | -17.064 | -16.658 | -16.216 | -10.769 | -10.408 | -10.290 | -9.739  |
| 214,5 | -4.306  | -4.418  | -4.773  | -4.162  | -30.382 | -30.046 | -29.343 | -28.011 | -16.235 | -16.271 | -15.858 | -15.451 | -10.507 | -10.130 | -10.018 | -9.451  |
| 215   | -4.021  | -4.141  | -4.491  | -3.851  | -30.147 | -29.666 | -28.974 | -27.736 | -15.559 | -15.535 | -15.185 | -14.757 | -10.272 | -9.910  | -9.772  | -9.211  |
| 215,5 | -3.776  | -3.912  | -4.238  | -3.589  | -29.978 | -29.353 | -28.643 | -27.517 | -14.965 | -14.851 | -14.640 | -14.123 | -10.095 | -9.740  | -9.571  | -8.981  |
| 216   | -3.542  | -3.709  | -4.004  | -3.361  | -29.843 | -29.112 | -28.389 | -27.263 | -14.391 | -14.199 | -14.154 | -13.538 | -9.992  | -9.576  | -9.397  | -8.803  |
| 216,5 | -3.368  | -3.554  | -3.782  | -3.192  | -29.716 | -28.934 | -28.252 | -27.060 | -13.816 | -13.589 | -13.735 | -13.020 | -9.935  | -9.445  | -9.260  | -8.656  |

|       |        |        |        |        |         |         |         |         |         |         |         |         |        |        |        |        |
|-------|--------|--------|--------|--------|---------|---------|---------|---------|---------|---------|---------|---------|--------|--------|--------|--------|
| 217   | -3.210 | -3.364 | -3.572 | -3.022 | -29.609 | -28.819 | -28.194 | -26.884 | -13.280 | -13.050 | -13.314 | -12.524 | -9.847 | -9.320 | -9.166 | -8.562 |
| 217,5 | -3.072 | -3.175 | -3.373 | -2.835 | -29.536 | -28.749 | -28.203 | -26.784 | -12.774 | -12.546 | -12.887 | -12.056 | -9.754 | -9.209 | -9.084 | -8.480 |
| 218   | -2.942 | -2.968 | -3.186 | -2.664 | -29.491 | -28.707 | -28.200 | -26.694 | -12.330 | -12.109 | -12.440 | -11.593 | -9.660 | -9.086 | -8.988 | -8.433 |
| 218,5 | -2.828 | -2.781 | -3.011 | -2.477 | -29.461 | -28.671 | -28.182 | -26.653 | -11.927 | -11.750 | -12.041 | -11.193 | -9.564 | -8.989 | -8.890 | -8.358 |
| 219   | -2.731 | -2.612 | -2.861 | -2.319 | -29.409 | -28.637 | -28.130 | -26.627 | -11.584 | -11.447 | -11.670 | -10.812 | -9.486 | -8.904 | -8.789 | -8.265 |
| 219,5 | -2.650 | -2.467 | -2.744 | -2.186 | -29.335 | -28.593 | -28.078 | -26.632 | -11.272 | -11.159 | -11.370 | -10.486 | -9.441 | -8.851 | -8.675 | -8.177 |
| 220   | -2.574 | -2.364 | -2.663 | -2.108 | -29.228 | -28.553 | -28.060 | -26.654 | -10.991 | -10.904 | -11.098 | -10.217 | -9.410 | -8.816 | -8.582 | -8.099 |
| 220,5 | -2.494 | -2.292 | -2.620 | -2.071 | -29.163 | -28.519 | -28.077 | -26.687 | -10.742 | -10.671 | -10.885 | -10.045 | -9.351 | -8.791 | -8.497 | -8.038 |
| 221   | -2.412 | -2.266 | -2.612 | -2.068 | -29.140 | -28.492 | -28.112 | -26.720 | -10.535 | -10.485 | -10.680 | -9.907  | -9.284 | -8.786 | -8.477 | -8.046 |
| 221,5 | -2.352 | -2.277 | -2.626 | -2.065 | -29.152 | -28.455 | -28.155 | -26.726 | -10.385 | -10.338 | -10.484 | -9.826  | -9.208 | -8.771 | -8.486 | -8.095 |
| 222   | -2.316 | -2.358 | -2.644 | -2.073 | -29.182 | -28.396 | -28.153 | -26.673 | -10.239 | -10.205 | -10.254 | -9.720  | -9.141 | -8.722 | -8.530 | -8.159 |
| 222,5 | -2.302 | -2.432 | -2.658 | -2.043 | -29.166 | -28.288 | -28.082 | -26.518 | -10.112 | -10.055 | -10.024 | -9.566  | -9.081 | -8.641 | -8.528 | -8.176 |
| 223   | -2.285 | -2.479 | -2.654 | -1.989 | -29.047 | -28.116 | -27.922 | -26.309 | -9.973  | -9.885  | -9.801  | -9.332  | -9.015 | -8.544 | -8.491 | -8.135 |
| 223,5 | -2.279 | -2.475 | -2.636 | -1.924 | -28.841 | -27.868 | -27.660 | -26.029 | -9.832  | -9.666  | -9.605  | -9.072  | -8.937 | -8.447 | -8.374 | -8.018 |
| 224   | -2.259 | -2.429 | -2.609 | -1.893 | -28.548 | -27.548 | -27.302 | -25.712 | -9.645  | -9.443  | -9.443  | -8.827  | -8.844 | -8.355 | -8.240 | -7.865 |
| 224,5 | -2.239 | -2.372 | -2.584 | -1.895 | -28.196 | -27.170 | -26.895 | -25.363 | -9.430  | -9.224  | -9.319  | -8.629  | -8.755 | -8.278 | -8.094 | -7.673 |
| 225   | -2.211 | -2.315 | -2.559 | -1.946 | -27.789 | -26.738 | -26.435 | -24.987 | -9.198  | -9.039  | -9.209  | -8.459  | -8.638 | -8.189 | -7.962 | -7.489 |
| 225,5 | -2.198 | -2.286 | -2.543 | -1.969 | -27.327 | -26.262 | -25.918 | -24.570 | -8.954  | -8.857  | -9.064  | -8.298  | -8.516 | -8.091 | -7.830 | -7.307 |
| 226   | -2.154 | -2.262 | -2.522 | -1.967 | -26.771 | -25.740 | -25.354 | -24.099 | -8.685  | -8.674  | -8.860  | -8.120  | -8.347 | -7.914 | -7.678 | -7.100 |
| 226,5 | -2.111 | -2.249 | -2.497 | -1.907 | -26.119 | -25.166 | -24.718 | -23.531 | -8.395  | -8.446  | -8.584  | -7.893  | -8.140 | -7.678 | -7.514 | -6.898 |
| 227   | -2.033 | -2.204 | -2.459 | -1.822 | -25.363 | -24.529 | -24.023 | -22.862 | -8.094  | -8.191  | -8.262  | -7.641  | -7.881 | -7.384 | -7.303 | -6.689 |
| 227,5 | -1.984 | -2.168 | -2.417 | -1.717 | -24.549 | -23.831 | -23.289 | -22.124 | -7.812  | -7.929  | -7.930  | -7.382  | -7.610 | -7.079 | -7.073 | -6.493 |
| 228   | -1.954 | -2.115 | -2.371 | -1.652 | -23.693 | -23.069 | -22.532 | -21.350 | -7.544  | -7.680  | -7.613  | -7.122  | -7.336 | -6.781 | -6.822 | -6.279 |
| 228,5 | -1.940 | -2.069 | -2.331 | -1.628 | -22.817 | -22.254 | -21.749 | -20.568 | -7.284  | -7.430  | -7.328  | -6.866  | -7.088 | -6.523 | -6.576 | -6.063 |
| 229   | -1.915 | -2.038 | -2.292 | -1.647 | -21.911 | -21.396 | -20.934 | -19.783 | -7.025  | -7.173  | -7.071  | -6.611  | -6.845 | -6.271 | -6.318 | -5.847 |
| 229,5 | -1.907 | -2.022 | -2.249 | -1.694 | -20.977 | -20.497 | -20.076 | -18.988 | -6.775  | -6.914  | -6.833  | -6.357  | -6.589 | -6.023 | -6.057 | -5.610 |
| 230   | -1.890 | -1.999 | -2.202 | -1.754 | -20.018 | -19.562 | -19.166 | -18.177 | -6.487  | -6.645  | -6.576  | -6.093  | -6.279 | -5.770 | -5.776 | -5.361 |

|       |        |        |        |        |         |         |         |         |        |        |        |        |        |        |        |        |
|-------|--------|--------|--------|--------|---------|---------|---------|---------|--------|--------|--------|--------|--------|--------|--------|--------|
| 230,5 | -1.870 | -1.984 | -2.151 | -1.787 | -19.016 | -18.597 | -18.211 | -17.320 | -6.182 | -6.355 | -6.310 | -5.837 | -5.939 | -5.505 | -5.492 | -5.107 |
| 231   | -1.837 | -1.957 | -2.093 | -1.772 | -18.009 | -17.610 | -17.222 | -16.438 | -5.871 | -6.060 | -6.036 | -5.578 | -5.581 | -5.220 | -5.202 | -4.864 |
| 231,5 | -1.788 | -1.919 | -2.030 | -1.720 | -16.988 | -16.614 | -16.225 | -15.528 | -5.568 | -5.767 | -5.740 | -5.314 | -5.229 | -4.950 | -4.904 | -4.599 |
| 232   | -1.697 | -1.852 | -1.965 | -1.632 | -15.972 | -15.624 | -15.232 | -14.597 | -5.267 | -5.452 | -5.416 | -5.010 | -4.884 | -4.661 | -4.607 | -4.321 |
| 232,5 | -1.578 | -1.783 | -1.898 | -1.550 | -14.941 | -14.653 | -14.270 | -13.655 | -4.962 | -5.122 | -5.088 | -4.692 | -4.570 | -4.377 | -4.321 | -4.030 |
| 233   | -1.453 | -1.700 | -1.825 | -1.469 | -13.937 | -13.705 | -13.351 | -12.725 | -4.654 | -4.768 | -4.760 | -4.375 | -4.280 | -4.066 | -4.044 | -3.736 |
| 233,5 | -1.364 | -1.638 | -1.747 | -1.421 | -12.952 | -12.782 | -12.469 | -11.819 | -4.354 | -4.413 | -4.442 | -4.055 | -3.996 | -3.766 | -3.777 | -3.444 |
| 234   | -1.294 | -1.560 | -1.665 | -1.370 | -12.023 | -11.874 | -11.617 | -10.955 | -4.059 | -4.089 | -4.146 | -3.738 | -3.719 | -3.474 | -3.512 | -3.165 |
| 234,5 | -1.246 | -1.495 | -1.581 | -1.305 | -11.122 | -10.985 | -10.766 | -10.134 | -3.779 | -3.789 | -3.864 | -3.430 | -3.447 | -3.204 | -3.230 | -2.903 |
| 235   | -1.195 | -1.412 | -1.496 | -1.211 | -10.267 | -10.116 | -9.926  | -9.360  | -3.517 | -3.506 | -3.589 | -3.141 | -3.180 | -2.950 | -2.948 | -2.644 |
| 235,5 | -1.132 | -1.334 | -1.409 | -1.123 | -9.453  | -9.274  | -9.103  | -8.618  | -3.263 | -3.249 | -3.337 | -2.885 | -2.917 | -2.727 | -2.681 | -2.415 |
| 236   | -1.046 | -1.237 | -1.323 | -1.028 | -8.661  | -8.472  | -8.314  | -7.899  | -3.017 | -3.006 | -3.081 | -2.648 | -2.659 | -2.520 | -2.435 | -2.204 |
| 236,5 | -0.945 | -1.152 | -1.243 | -0.944 | -7.898  | -7.724  | -7.573  | -7.194  | -2.787 | -2.772 | -2.829 | -2.434 | -2.409 | -2.315 | -2.205 | -2.017 |
| 237   | -0.873 | -1.068 | -1.167 | -0.862 | -7.192  | -7.040  | -6.900  | -6.539  | -2.566 | -2.551 | -2.599 | -2.254 | -2.191 | -2.123 | -2.022 | -1.856 |
| 237,5 | -0.826 | -0.997 | -1.094 | -0.793 | -6.528  | -6.419  | -6.279  | -5.941  | -2.354 | -2.354 | -2.392 | -2.103 | -2.003 | -1.947 | -1.865 | -1.729 |
| 238   | -0.806 | -0.959 | -1.025 | -0.749 | -5.915  | -5.862  | -5.700  | -5.409  | -2.160 | -2.189 | -2.216 | -1.975 | -1.854 | -1.783 | -1.741 | -1.608 |
| 238,5 | -0.789 | -0.946 | -0.959 | -0.700 | -5.335  | -5.357  | -5.169  | -4.925  | -1.982 | -2.039 | -2.041 | -1.841 | -1.721 | -1.614 | -1.617 | -1.479 |
| 239   | -0.775 | -0.937 | -0.892 | -0.672 | -4.816  | -4.892  | -4.697  | -4.476  | -1.823 | -1.891 | -1.894 | -1.709 | -1.616 | -1.465 | -1.496 | -1.343 |
| 239,5 | -0.745 | -0.924 | -0.822 | -0.647 | -4.343  | -4.451  | -4.256  | -4.039  | -1.657 | -1.741 | -1.758 | -1.570 | -1.509 | -1.335 | -1.368 | -1.202 |
| 240   | -0.693 | -0.901 | -0.752 | -0.632 | -3.925  | -4.028  | -3.835  | -3.623  | -1.517 | -1.573 | -1.637 | -1.428 | -1.398 | -1.218 | -1.247 | -1.059 |
| 240,5 | -0.620 | -0.838 | -0.684 | -0.585 | -3.519  | -3.622  | -3.431  | -3.237  | -1.377 | -1.408 | -1.494 | -1.268 | -1.277 | -1.105 | -1.118 | -0.931 |
| 241   | -0.529 | -0.748 | -0.623 | -0.530 | -3.145  | -3.240  | -3.044  | -2.871  | -1.251 | -1.238 | -1.346 | -1.123 | -1.156 | -0.998 | -1.001 | -0.813 |
| 241,5 | -0.443 | -0.638 | -0.567 | -0.454 | -2.774  | -2.889  | -2.685  | -2.546  | -1.115 | -1.089 | -1.184 | -0.988 | -1.018 | -0.885 | -0.901 | -0.709 |
| 242   | -0.357 | -0.534 | -0.518 | -0.385 | -2.430  | -2.574  | -2.362  | -2.236  | -0.985 | -0.960 | -1.016 | -0.871 | -0.881 | -0.778 | -0.814 | -0.628 |
| 242,5 | -0.290 | -0.454 | -0.473 | -0.338 | -2.120  | -2.291  | -2.080  | -1.960  | -0.857 | -0.865 | -0.875 | -0.770 | -0.758 | -0.677 | -0.723 | -0.568 |
| 243   | -0.229 | -0.408 | -0.432 | -0.288 | -1.863  | -2.046  | -1.843  | -1.696  | -0.742 | -0.781 | -0.758 | -0.678 | -0.647 | -0.581 | -0.621 | -0.514 |
| 243,5 | -0.187 | -0.385 | -0.395 | -0.250 | -1.646  | -1.829  | -1.643  | -1.467  | -0.629 | -0.724 | -0.687 | -0.601 | -0.578 | -0.493 | -0.519 | -0.478 |

|       |        |        |        |        |        |        |        |        |        |        |        |        |        |        |        |        |
|-------|--------|--------|--------|--------|--------|--------|--------|--------|--------|--------|--------|--------|--------|--------|--------|--------|
| 244   | -0.169 | -0.382 | -0.358 | -0.232 | -1.467 | -1.636 | -1.475 | -1.277 | -0.558 | -0.670 | -0.653 | -0.559 | -0.558 | -0.424 | -0.443 | -0.466 |
| 244,5 | -0.155 | -0.373 | -0.326 | -0.212 | -1.293 | -1.467 | -1.322 | -1.123 | -0.508 | -0.607 | -0.634 | -0.516 | -0.551 | -0.356 | -0.382 | -0.456 |
| 245   | -0.136 | -0.351 | -0.297 | -0.171 | -1.117 | -1.321 | -1.182 | -0.979 | -0.467 | -0.551 | -0.606 | -0.476 | -0.549 | -0.305 | -0.347 | -0.434 |
| 245,5 | -0.130 | -0.317 | -0.271 | -0.147 | -0.945 | -1.189 | -1.036 | -0.855 | -0.427 | -0.510 | -0.571 | -0.431 | -0.537 | -0.265 | -0.312 | -0.392 |
| 246   | -0.137 | -0.277 | -0.244 | -0.119 | -0.800 | -1.065 | -0.908 | -0.734 | -0.381 | -0.479 | -0.514 | -0.369 | -0.509 | -0.232 | -0.273 | -0.337 |
| 246,5 | -0.148 | -0.245 | -0.214 | -0.094 | -0.691 | -0.945 | -0.784 | -0.609 | -0.321 | -0.449 | -0.452 | -0.311 | -0.476 | -0.212 | -0.234 | -0.263 |
| 247   | -0.135 | -0.220 | -0.180 | -0.059 | -0.594 | -0.825 | -0.663 | -0.464 | -0.261 | -0.406 | -0.384 | -0.254 | -0.436 | -0.179 | -0.178 | -0.168 |
| 247,5 | -0.100 | -0.191 | -0.143 | -0.009 | -0.481 | -0.707 | -0.541 | -0.314 | -0.187 | -0.344 | -0.312 | -0.198 | -0.381 | -0.121 | -0.119 | -0.065 |
| 248   | -0.066 | -0.175 | -0.100 | 0.020  | -0.375 | -0.594 | -0.424 | -0.190 | -0.142 | -0.288 | -0.253 | -0.150 | -0.340 | -0.079 | -0.088 | -0.002 |
| 248,5 | -0.034 | -0.164 | -0.063 | 0.025  | -0.280 | -0.496 | -0.322 | -0.104 | -0.123 | -0.248 | -0.230 | -0.121 | -0.297 | -0.060 | -0.097 | 0.024  |
| 249   | -0.005 | -0.160 | -0.039 | 0.030  | -0.191 | -0.421 | -0.236 | -0.052 | -0.120 | -0.220 | -0.203 | -0.091 | -0.260 | -0.071 | -0.113 | 0.007  |
| 249,5 | -0.013 | -0.166 | -0.033 | 0.014  | -0.135 | -0.367 | -0.181 | -0.040 | -0.129 | -0.227 | -0.212 | -0.074 | -0.229 | -0.106 | -0.136 | -0.024 |
| 250   | -0.039 | -0.178 | -0.043 | 0.004  | -0.110 | -0.332 | -0.166 | -0.050 | -0.158 | -0.247 | -0.215 | -0.064 | -0.223 | -0.152 | -0.146 | -0.063 |
| 250,5 | -0.060 | -0.184 | -0.066 | 0.004  | -0.095 | -0.314 | -0.184 | -0.056 | -0.172 | -0.257 | -0.221 | -0.062 | -0.211 | -0.173 | -0.141 | -0.077 |
| 251   | -0.065 | -0.190 | -0.088 | 0.010  | -0.081 | -0.304 | -0.198 | -0.043 | -0.160 | -0.245 | -0.190 | -0.068 | -0.193 | -0.164 | -0.126 | -0.061 |
| 251,5 | -0.053 | -0.185 | -0.099 | 0.021  | -0.062 | -0.295 | -0.195 | -0.019 | -0.125 | -0.224 | -0.163 | -0.064 | -0.166 | -0.126 | -0.101 | -0.013 |
| 252   | -0.040 | -0.186 | -0.091 | 0.015  | -0.059 | -0.277 | -0.183 | -0.001 | -0.086 | -0.208 | -0.134 | -0.067 | -0.148 | -0.097 | -0.106 | 0.016  |
| 252,5 | -0.045 | -0.184 | -0.068 | 0.000  | -0.064 | -0.249 | -0.156 | 0.012  | -0.047 | -0.200 | -0.100 | -0.068 | -0.137 | -0.075 | -0.125 | 0.021  |
| 253   | -0.022 | -0.162 | -0.035 | -0.003 | -0.050 | -0.210 | -0.107 | 0.051  | 0.009  | -0.175 | -0.049 | -0.051 | -0.123 | -0.050 | -0.138 | 0.033  |
| 253,5 | -0.011 | -0.144 | -0.004 | 0.010  | -0.022 | -0.161 | -0.066 | 0.078  | 0.054  | -0.165 | -0.015 | -0.044 | -0.130 | -0.044 | -0.145 | 0.025  |
| 254   | 0.008  | -0.122 | 0.015  | 0.025  | 0.007  | -0.113 | -0.028 | 0.108  | 0.089  | -0.149 | 0.000  | -0.034 | -0.127 | -0.028 | -0.135 | 0.023  |
| 254,5 | 0.023  | -0.097 | 0.019  | 0.045  | 0.042  | -0.077 | -0.011 | 0.116  | 0.110  | -0.135 | 0.001  | -0.036 | -0.156 | -0.016 | -0.111 | 0.021  |
| 255   | 0.046  | -0.074 | 0.016  | 0.047  | 0.071  | -0.056 | 0.000  | 0.116  | 0.120  | -0.115 | -0.015 | -0.036 | -0.188 | -0.013 | -0.091 | 0.030  |
| 255,5 | 0.054  | -0.059 | 0.013  | 0.056  | 0.075  | -0.049 | 0.003  | 0.094  | 0.125  | -0.107 | -0.030 | -0.046 | -0.218 | -0.030 | -0.070 | 0.044  |
| 256   | 0.078  | -0.040 | 0.019  | 0.072  | 0.074  | -0.049 | 0.020  | 0.099  | 0.121  | -0.083 | -0.028 | -0.031 | -0.216 | -0.034 | -0.044 | 0.072  |
| 256,5 | 0.105  | -0.017 | 0.040  | 0.106  | 0.084  | -0.047 | 0.052  | 0.125  | 0.115  | -0.062 | -0.003 | 0.004  | -0.201 | -0.028 | -0.012 | 0.104  |
| 257   | 0.141  | 0.013  | 0.067  | 0.160  | 0.121  | -0.038 | 0.110  | 0.179  | 0.109  | -0.028 | 0.040  | 0.057  | -0.158 | 0.003  | 0.025  | 0.144  |

|       |       |        |       |        |       |        |       |       |       |        |        |       |        |        |        |       |
|-------|-------|--------|-------|--------|-------|--------|-------|-------|-------|--------|--------|-------|--------|--------|--------|-------|
| 257,5 | 0.173 | 0.032  | 0.091 | 0.202  | 0.147 | -0.021 | 0.166 | 0.234 | 0.112 | 0.008  | 0.074  | 0.116 | -0.115 | 0.032  | 0.054  | 0.176 |
| 258   | 0.180 | 0.026  | 0.100 | 0.203  | 0.164 | -0.002 | 0.186 | 0.270 | 0.098 | 0.026  | 0.082  | 0.159 | -0.093 | 0.059  | 0.045  | 0.183 |
| 258,5 | 0.178 | -0.008 | 0.090 | 0.159  | 0.153 | 0.014  | 0.162 | 0.272 | 0.080 | 0.027  | 0.049  | 0.177 | -0.095 | 0.063  | 0.006  | 0.163 |
| 259   | 0.157 | -0.047 | 0.068 | 0.099  | 0.143 | 0.020  | 0.125 | 0.228 | 0.061 | 0.018  | 0.012  | 0.165 | -0.102 | 0.046  | -0.041 | 0.132 |
| 259,5 | 0.134 | -0.092 | 0.043 | 0.028  | 0.116 | 0.022  | 0.075 | 0.175 | 0.050 | -0.007 | -0.022 | 0.143 | -0.113 | 0.014  | -0.092 | 0.097 |
| 260   | 0.119 | -0.126 | 0.021 | -0.021 | 0.112 | 0.019  | 0.032 | 0.130 | 0.049 | -0.021 | -0.042 | 0.115 | -0.116 | -0.001 | -0.122 | 0.075 |

## Dynamic Light Scattering (DLS)

| Radius<br>(nm) | IBMP-8.1                 |        |        |        | IBMP-8.2                 |        |        |        | IBMP-8.3                 |        |        |    | IBMP-8.4                 |        |        |        |
|----------------|--------------------------|--------|--------|--------|--------------------------|--------|--------|--------|--------------------------|--------|--------|----|--------------------------|--------|--------|--------|
|                | Time of exposure (hours) |        |        |        | Time of exposure (hours) |        |        |        | Time of exposure (hours) |        |        |    | Time of exposure (hours) |        |        |        |
|                | 0                        | 24     | 48     | 72     | 0                        | 24     | 48     | 72     | 0                        | 24     | 48     | 72 | 0                        | 24     | 48     | 72     |
| 0.0260057      | 0                        | 0      | 0      | 0      | 0                        | 0      | 0      | 0      | 0                        | 0      | 0      | 0  | 0                        | 0      | 0      | 0      |
| 0.0329794      | 0                        | 0      | 0      | 0      | 0                        | 0      | 0      | 0      | 0                        | 0      | 0      | 0  | 0                        | 0      | 0      | 0      |
| 0.0418231      | 0                        | 0      | 0      | 0      | 0                        | 0      | 0      | 0      | 0                        | 0      | 0      | 0  | 0                        | 0      | 0      | 0      |
| 0.0530384      | 0                        | 0      | 0      | 0      | 0                        | 0      | 0      | 0      | 0                        | 0      | 0      | 0  | 0                        | 0      | 0      | 0      |
| 0.0672611      | 0                        | 0      | 0      | 0      | 0                        | 0      | 0      | 0      | 0                        | 0      | 0      | 0  | 0                        | 0      | 0      | 0      |
| 0.0852978      | 0                        | 0      | 0      | 0      | 0                        | 0      | 0      | 0      | 0                        | 0      | 0      | 0  | 0                        | 0      | 0      | 0      |
| 0.108171       | 0                        | 0      | 0      | 0      | 0                        | 0      | 0      | 0      | 0                        | 0      | 0      | 0  | 0                        | 0      | 0      | 0      |
| 0.137178       | 0                        | 0      | 0      | 0      | 0                        | 0      | 0      | 0      | 0                        | 0      | 0      | 0  | 0                        | 0      | 0      | 0      |
| 0.173964       | 0                        | 0      | 0      | 0      | 0                        | 0      | 0      | 0      | 0                        | 0      | 0      | 0  | 0                        | 0      | 0      | 0      |
| 0.220614       | 0                        | 0      | 0      | 0      | 0                        | 0      | 0      | 0      | 0                        | 0      | 0      | 0  | 0                        | 0      | 0      | 0      |
| 0.279774       | 0                        | 0      | 0      | 0      | 0                        | 0      | 0      | 0      | 0                        | 0      | 0      | 0  | 0                        | 0      | 0      | 0      |
| 0.354797       | 0                        | 0      | 0      | 0      | 0                        | 0      | 0      | 0      | 0                        | 0      | 0      | 0  | 0                        | 0      | 0      | 0      |
| 0.44994        | 0                        | 0      | 0      | 0      | 0                        | 0      | 0      | 0      | 0                        | 0      | 0      | 0  | 0                        | 0      | 0      | 0      |
| 0.570595       | 0                        | 0      | 0      | 0      | 0                        | 0      | 0      | 0      | 0                        | 0      | 0      | 0  | 0                        | 0      | 0      | 0      |
| 0.723605       | 0                        | 0      | 0      | 0      | 0                        | 0      | 0      | 0      | 0                        | 0      | 0      | 0  | 0                        | 0      | 0      | 0      |
| 0.917647       | 0                        | 0      | 0      | 0      | 0                        | 0      | 0      | 0      | 0                        | 0      | 0      | 0  | 0                        | 0      | 0      | 0      |
| 1.16372        | 0                        | 0      | 0      | 0      | 0                        | 0      | 0      | 0      | 0                        | 0      | 0      | 0  | 0                        | 0      | 0      | 0      |
| 1.47579        | 0                        | 0      | 0      | 6.937  | 0                        | 0      | 0      | 0      | 0                        | 0      | 0      | 0  | 0                        | 0      | 0      | 0      |
| 1.87153        | 5.405                    | 0      | 10.983 | 12.595 | 0                        | 0      | 0      | 0      | 0                        | 0      | 0      | 0  | 0                        | 0      | 0      | 0      |
| 2.3734         | 48.895                   | 32.038 | 33.009 | 27.779 | 0                        | 0      | 17.722 | 9.759  | 0                        | 13.662 | 0      | 0  | 0                        | 0      | 0      | 4.953  |
| 3.00985        | 30.414                   | 36.008 | 29.595 | 25.955 | 47.823                   | 39.251 | 38.342 | 40.559 | 9.713                    | 34.260 | 33.601 | 0  | 21.356                   | 32.796 | 30.976 | 25.539 |

|         |       |        |        |        |        |        |        |        |        |        |        |        |        |        |        |        |
|---------|-------|--------|--------|--------|--------|--------|--------|--------|--------|--------|--------|--------|--------|--------|--------|--------|
| 3.81697 | 9.252 | 18.180 | 14.628 | 13.375 | 36.099 | 41.643 | 26.881 | 30.047 | 73.570 | 26.637 | 36.679 | 33.728 | 34.049 | 31.924 | 31.056 | 25.969 |
| 4.84052 | 1.493 | 4.594  | 4.424  | 4.192  | 13.631 | 16.034 | 11.813 | 12.666 | 22.038 | 14.255 | 19.776 | 19.800 | 22.686 | 18.962 | 18.846 | 16.750 |
| 6.13855 | 0     | 0      | 0.713  | 0.693  | 2.328  | 1.530  | 3.435  | 3.013  | 4.794  | 6.257  | 6.860  | 3.882  | 10.139 | 8.606  | 8.662  | 8.156  |
| 7.78466 | 0     | 0      | 0      | 0.221  | 0      | 0      | 0.496  | 0.080  | 0      | 2.371  | 1.398  | 0      | 3.276  | 3.154  | 3.165  | 3.073  |
| 9.87219 | 0     | 0      | 0      | 0      | 0      | 0      | 0      | 0      | 0      | 0      | 0      | 0      | 0.678  | 0.917  | 0.886  | 0.829  |
| 12.5195 | 0     | 0      | 0      | 0      | 0      | 0      | 0      | 0      | 0      | 0      | 0      | 0      | 0      | 0      | 0      | 0      |
| 15.8767 | 0     | 0      | 0      | 0      | 0      | 0      | 0      | 0      | 0      | 0      | 0      | 0      | 0      | 0      | 0      | 0      |
| 20.1342 | 0     | 0      | 0      | 0      | 0      | 0      | 0      | 0      | 0      | 0      | 0      | 0      | 0      | 0      | 0      | 0      |
| 25.5334 | 0     | 0      | 0      | 0      | 0      | 0      | 0      | 0      | 0      | 0      | 0      | 0      | 0      | 0      | 0      | 0      |
| 32.3804 | 0     | 0      | 0      | 0      | 0      | 0      | 0      | 0      | 0      | 0      | 0      | 0      | 0      | 0      | 0      | 0      |
| 41.0635 | 0     | 0      | 0      | 0      | 0      | 0      | 0      | 0      | 0      | 0      | 0      | 0      | 0      | 0      | 0      | 0      |
| 52.0751 | 0     | 0      | 0      | 0      | 0      | 0      | 0      | 0      | 0      | 0      | 0      | 0      | 0      | 0      | 0      | 0      |
| 66.0395 | 0     | 0      | 0      | 0      | 0      | 0      | 0      | 0      | 0      | 0      | 0      | 0      | 0      | 0      | 0      | 0      |
| 83.7486 | 0     | 0      | 0      | 0      | 0      | 0      | 0      | 0      | 0      | 0      | 0      | 0      | 0      | 0      | 0      | 0      |
| 106.207 | 0     | 0      | 0      | 0      | 0      | 0      | 0      | 0      | 0      | 0      | 0      | 0      | 0      | 0      | 0      | 0      |
| 134.687 | 0     | 0      | 0      | 0      | 0      | 0      | 0      | 0      | 0      | 0      | 0      | 0      | 0      | 0      | 0      | 0      |
| 170.804 | 0     | 0      | 0      | 0      | 0      | 0      | 0      | 0      | 0      | 0      | 0      | 0      | 0      | 0      | 0      | 0      |
| 216.607 | 0     | 0      | 0      | 0      | 0      | 0      | 0      | 0      | 0      | 0      | 0      | 0      | 0      | 0      | 0      | 0      |
| 274.692 | 0     | 0      | 0      | 0      | 0      | 0      | 0      | 0      | 0      | 0      | 0      | 0      | 0      | 0      | 0      | 0      |
| 348.354 | 0     | 0      | 0      | 0      | 0      | 0      | 0      | 0      | 0      | 0      | 0      | 0      | 0      | 0      | 0      | 0      |
| 441.768 | 0     | 0      | 0      | 0      | 0      | 0      | 0      | 0      | 0      | 0      | 0      | 0      | 0      | 0      | 0      | 0      |
| 560.232 | 0     | 0      | 0      | 0      | 0      | 0      | 0      | 0      | 0      | 0      | 0      | 0      | 0      | 0      | 0      | 0      |
| 710.463 | 0     | 0      | 0      | 0      | 0      | 0      | 0      | 0      | 0      | 0      | 0      | 0      | 0      | 0      | 0      | 0      |
| 900.981 | 0     | 0      | 0      | 0      | 0      | 0      | 0      | 0      | 0      | 0      | 0      | 0      | 0      | 0      | 0      | 0      |
| 1142.59 | 0     | 0      | 0      | 0      | 0      | 0      | 0      | 0      | 0      | 0      | 0      | 0      | 0      | 0      | 0      | 0      |
| 1448.98 | 0     | 0      | 0      | 0      | 0      | 0      | 0      | 0      | 0      | 0      | 0      | 0      | 0      | 0      | 0      | 0      |
| 1837.54 | 0     | 0      | 0      | 0      | 0      | 0      | 0      | 0      | 0      | 0      | 0      | 0.038  | 0      | 0      | 0      | 0      |



[illegible]

## Indirect ELISA

| Samples                               | IBMP-8.1                    |      |      |      | IBMP-8.2                    |      |      |      | IBMP-8.3                    |      |      |      | IBMP-8.4                    |      |      |      |
|---------------------------------------|-----------------------------|------|------|------|-----------------------------|------|------|------|-----------------------------|------|------|------|-----------------------------|------|------|------|
|                                       | Time of exposure<br>(hours) |      |      |      | Time of exposure<br>(hours) |      |      |      | Time of exposure<br>(hours) |      |      |      | Time of exposure<br>(hours) |      |      |      |
|                                       | 0                           | 24   | 48   | 72   | 0                           | 24   | 48   | 72   | 0                           | 24   | 48   | 72   | 0                           | 24   | 48   | 72   |
| <i>Trypanosoma cruzi</i> -negative 01 | 1.11                        | 0.66 | 0.69 | 0.37 | 0.27                        | 0.25 | 0.27 | 0.31 | 0.36                        | 0.60 | 0.44 | 0.29 | 0.53                        | 0.28 | 0.44 | 0.35 |
| <i>Trypanosoma cruzi</i> -negative 02 | 2.43                        | 1.69 | 1.97 | 0.92 | 0.28                        | 0.17 | 0.20 | 0.38 | 0.19                        | 0.32 | 0.23 | 0.25 | 0.34                        | 0.23 | 0.25 | 0.24 |
| <i>Trypanosoma cruzi</i> -negative 03 | 1.90                        | 0.72 | 0.71 | 0.38 | 0.29                        | 0.18 | 0.32 | 0.29 | 0.23                        | 0.32 | 0.53 | 0.29 | 0.29                        | 0.28 | 0.33 | 0.32 |
| <i>Trypanosoma cruzi</i> -negative 04 | 2.09                        | 1.08 | 1.25 | 0.48 | 0.21                        | 0.16 | 0.18 | 0.23 | 0.17                        | 0.21 | 0.18 | 0.33 | 0.38                        | 0.25 | 0.24 | 0.29 |
| <i>Trypanosoma cruzi</i> -negative 05 | 0.77                        | 0.57 | 0.72 | 0.61 | 0.25                        | 0.16 | 0.21 | 0.28 | 0.73                        | 0.37 | 0.69 | 0.49 | 0.27                        | 0.18 | 0.22 | 0.28 |
| <i>Trypanosoma cruzi</i> -negative 06 | 1.28                        | 0.67 | 0.99 | 0.48 | 0.28                        | 0.20 | 0.22 | 0.24 | 0.20                        | 0.38 | 0.29 | 0.29 | 0.21                        | 0.18 | 0.26 | 0.23 |
| <i>Trypanosoma cruzi</i> -negative 07 | 1.11                        | 0.79 | 0.79 | 0.52 | 0.24                        | 0.19 | 0.20 | 0.23 | 0.21                        | 0.24 | 0.23 | 0.24 | 0.27                        | 0.19 | 0.21 | 0.22 |
| <i>Trypanosoma cruzi</i> -negative 08 | 1.86                        | 0.84 | 0.87 | 0.46 | 0.23                        | 0.23 | 0.20 | 0.34 | 0.25                        | 0.40 | 0.27 | 0.26 | 0.21                        | 0.18 | 0.23 | 0.24 |
| <i>Trypanosoma cruzi</i> -negative 09 | 0.74                        | 0.65 | 0.74 | 0.37 | 0.27                        | 0.20 | 0.26 | 0.27 | 0.21                        | 0.64 | 0.30 | 0.29 | 0.29                        | 0.28 | 0.26 | 0.28 |
| <i>Trypanosoma cruzi</i> -negative 10 | 0.91                        | 1.30 | 1.45 | 0.68 | 0.22                        | 0.25 | 0.25 | 0.30 | 0.25                        | 0.30 | 0.28 | 0.54 | 0.34                        | 0.27 | 0.27 | 0.36 |
| <i>Trypanosoma cruzi</i> -negative 11 | 1.89                        | 1.13 | 1.28 | 0.68 | 0.49                        | 0.25 | 0.24 | 0.34 | 0.21                        | 0.32 | 0.31 | 0.31 | 0.38                        | 0.19 | 0.27 | 0.27 |
| <i>Trypanosoma cruzi</i> -negative 12 | 1.42                        | 0.88 | 0.86 | 0.35 | 0.23                        | 0.18 | 0.25 | 0.34 | 0.20                        | 0.35 | 0.35 | 0.30 | 0.56                        | 0.40 | 0.28 | 0.40 |
| <i>Trypanosoma cruzi</i> -negative 13 | 0.64                        | 0.58 | 0.54 | 0.32 | 0.27                        | 0.24 | 0.58 | 0.40 | 0.30                        | 0.44 | 0.45 | 0.43 | 0.44                        | 0.28 | 0.40 | 0.25 |
| <i>Trypanosoma cruzi</i> -negative 14 | 1.33                        | 0.62 | 0.71 | 0.50 | 0.22                        | 0.17 | 0.34 | 0.24 | 0.18                        | 0.24 | 0.24 | 0.25 | 0.19                        | 0.17 | 0.23 | 0.22 |
| <i>Trypanosoma cruzi</i> -negative 15 | 0.61                        | 0.33 | 0.36 | 0.25 | 0.21                        | 0.21 | 0.19 | 0.20 | 0.20                        | 0.29 | 0.25 | 0.26 | 0.21                        | 0.20 | 1.57 | 0.24 |
| <i>Trypanosoma cruzi</i> -negative 16 | 2.20                        | 1.30 | 1.26 | 0.64 | 0.23                        | 0.24 | 0.27 | 0.29 | 0.20                        | 0.25 | 0.27 | 0.28 | 0.19                        | 0.20 | 0.25 | 0.26 |
| <i>Trypanosoma cruzi</i> -negative 17 | 1.52                        | 0.45 | 0.50 | 0.31 | 0.24                        | 0.18 | 0.22 | 0.23 | 0.24                        | 0.38 | 0.28 | 0.25 | 0.36                        | 0.19 | 0.28 | 0.24 |
| <i>Trypanosoma cruzi</i> -negative 18 | 1.18                        | 0.86 | 0.89 | 0.55 | 0.17                        | 0.22 | 0.18 | 0.27 | 0.22                        | 0.23 | 0.24 | 0.21 | 0.21                        | 0.16 | 0.15 | 0.20 |
| <i>Trypanosoma cruzi</i> -negative 19 | 1.64                        | 0.73 | 0.92 | 0.41 | 0.30                        | 0.16 | 0.20 | 0.26 | 0.18                        | 0.31 | 0.46 | 0.25 | 0.24                        | 0.15 | 0.18 | 0.20 |
| <i>Trypanosoma cruzi</i> -negative 20 | 1.16                        | 0.72 | 0.94 | 0.38 | 0.29                        | 0.20 | 0.25 | 0.27 | 0.23                        | 0.31 | 0.24 | 0.36 | 0.35                        | 0.25 | 0.24 | 0.30 |
| <i>Trypanosoma cruzi</i> -negative 21 | 0.68                        | 0.34 | 0.42 | 0.43 | 0.37                        | 0.25 | 0.28 | 0.31 | 0.24                        | 0.35 | 0.32 | 0.27 | 0.36                        | 0.26 | 0.29 | 0.26 |

|                                       |      |      |      |      |      |      |      |      |      |      |      |      |      |      |      |      |
|---------------------------------------|------|------|------|------|------|------|------|------|------|------|------|------|------|------|------|------|
| <i>Trypanosoma cruzi</i> -negative 22 | 2.11 | 1.18 | 1.56 | 0.66 | 0.22 | 0.45 | 0.19 | 0.23 | 0.21 | 0.33 | 0.32 | 0.25 | 0.19 | 0.17 | 0.25 | 0.25 |
| <i>Trypanosoma cruzi</i> -negative 23 | 2.65 | 1.51 | 1.95 | 0.80 | 0.35 | 0.22 | 0.21 | 0.29 | 0.23 | 0.31 | 0.26 | 0.29 | 0.22 | 0.21 | 0.26 | 0.28 |
| <i>Trypanosoma cruzi</i> -negative 24 | 0.55 | 0.33 | 0.51 | 0.26 | 0.30 | 0.29 | 0.29 | 0.43 | 0.25 | 0.39 | 0.35 | 0.50 | 0.33 | 0.31 | 0.31 | 0.32 |
| <i>Trypanosoma cruzi</i> -negative 25 | 0.55 | 0.43 | 0.58 | 0.28 | 0.22 | 0.22 | 0.43 | 0.31 | 0.21 | 0.25 | 0.28 | 0.34 | 0.23 | 0.18 | 0.24 | 0.24 |
| <i>Trypanosoma cruzi</i> -negative 26 | 1.41 | 0.50 | 0.75 | 0.29 | 0.30 | 0.18 | 0.19 | 0.32 | 0.24 | 0.25 | 0.23 | 0.28 | 0.20 | 0.18 | 0.21 | 0.21 |
| <i>Trypanosoma cruzi</i> -negative 27 | 1.74 | 1.00 | 0.95 | 0.48 | 0.27 | 0.22 | 0.26 | 0.34 | 0.25 | 0.30 | 0.46 | 0.25 | 0.24 | 0.26 | 0.27 | 0.28 |
| <i>Trypanosoma cruzi</i> -negative 28 | 1.44 | 0.59 | 0.68 | 0.29 | 0.26 | 0.23 | 0.31 | 0.57 | 0.30 | 0.45 | 0.67 | 0.32 | 0.61 | 0.40 | 0.42 | 0.34 |
| <i>Trypanosoma cruzi</i> -negative 29 | 1.65 | 0.74 | 0.77 | 0.42 | 0.18 | 0.16 | 0.21 | 0.21 | 0.18 | 0.28 | 0.38 | 0.25 | 0.23 | 0.17 | 0.27 | 0.20 |
| <i>Trypanosoma cruzi</i> -negative 30 | 1.76 | 0.64 | 1.00 | 0.44 | 0.24 | 0.22 | 0.23 | 0.30 | 0.22 | 0.29 | 0.28 | 0.25 | 0.22 | 0.22 | 0.28 | 0.28 |
| <i>Trypanosoma cruzi</i> -negative 31 | 1.52 | 0.52 | 0.56 | 0.22 | 0.32 | 0.23 | 0.20 | 0.33 | 0.22 | 0.30 | 0.27 | 0.23 | 0.21 | 0.22 | 0.28 | 0.24 |
| <i>Trypanosoma cruzi</i> -negative 32 | 1.90 | 1.00 | 0.88 | 0.46 | 0.22 | 0.17 | 0.23 | 0.24 | 0.17 | 0.38 | 0.26 | 0.26 | 0.16 | 0.16 | 0.27 | 0.28 |
| <i>Trypanosoma cruzi</i> -negative 33 | 0.87 | 0.56 | 0.73 | 0.33 | 0.20 | 0.17 | 0.19 | 0.25 | 0.16 | 0.19 | 0.21 | 0.23 | 0.21 | 0.15 | 0.23 | 0.25 |
| <i>Trypanosoma cruzi</i> -negative 34 | 1.80 | 0.95 | 0.90 | 0.35 | 0.27 | 0.25 | 0.35 | 0.28 | 0.27 | 0.33 | 0.40 | 0.18 | 0.39 | 0.25 | 0.32 | 0.32 |
| <i>Trypanosoma cruzi</i> -negative 35 | 1.56 | 1.27 | 1.92 | 0.55 | 0.27 | 0.27 | 0.31 | 0.34 | 0.28 | 0.36 | 0.38 | 0.12 | 0.47 | 0.23 | 0.38 | 0.32 |
| <i>Trypanosoma cruzi</i> -negative 36 | 1.65 | 0.83 | 0.97 | 0.31 | 0.19 | 0.20 | 0.17 | 0.25 | 0.20 | 0.23 | 0.28 | 0.26 | 0.29 | 0.17 | 0.23 | 0.30 |
| <i>Trypanosoma cruzi</i> -negative 37 | 0.92 | 0.38 | 0.47 | 0.25 | 0.19 | 0.21 | 0.22 | 0.43 | 0.20 | 0.28 | 0.26 | 0.40 | 0.36 | 0.25 | 0.25 | 0.27 |
| <i>Trypanosoma cruzi</i> -negative 38 | 1.91 | 1.04 | 1.43 | 0.67 | 0.26 | 0.20 | 0.23 | 0.27 | 0.25 | 0.45 | 0.31 | 0.36 | 0.30 | 0.41 | 0.27 | 0.26 |
| <i>Trypanosoma cruzi</i> -negative 39 | 2.32 | 1.41 | 1.67 | 0.84 | 0.29 | 0.33 | 0.31 | 0.40 | 0.27 | 0.50 | 0.38 | 0.18 | 0.36 | 0.28 | 0.34 | 0.37 |
| <i>Trypanosoma cruzi</i> -negative 40 | 2.60 | 2.17 | 2.55 | 1.10 | 0.29 | 0.25 | 0.22 | 0.29 | 0.19 | 0.37 | 0.27 | 0.27 | 0.30 | 0.21 | 0.25 | 0.23 |
| <i>Trypanosoma cruzi</i> -negative 41 | 1.18 | 0.67 | 0.82 | 0.32 | 0.22 | 0.19 | 0.24 | 0.25 | 0.20 | 0.26 | 0.30 | 0.27 | 0.31 | 0.20 | 0.35 | 0.30 |
| <i>Trypanosoma cruzi</i> -negative 42 | 1.31 | 0.86 | 1.14 | 0.62 | 0.17 | 0.14 | 0.16 | 0.18 | 0.16 | 0.19 | 0.20 | 0.22 | 0.19 | 0.14 | 0.20 | 0.25 |
| <i>Trypanosoma cruzi</i> -negative 43 | 0.95 | 0.74 | 0.90 | 0.44 | 0.23 | 0.16 | 0.24 | 0.29 | 0.19 | 0.28 | 0.28 | 0.30 | 0.21 | 0.16 | 0.28 | 0.27 |
| <i>Trypanosoma cruzi</i> -negative 44 | 0.76 | 0.63 | 0.74 | 0.45 | 0.19 | 0.21 | 0.21 | 0.32 | 0.20 | 0.29 | 0.32 | 0.31 | 0.62 | 0.37 | 0.27 | 0.36 |
| <i>Trypanosoma cruzi</i> -negative 45 | 1.46 | 1.04 | 1.22 | 0.65 | 0.17 | 0.19 | 0.22 | 0.29 | 0.19 | 0.40 | 0.22 | 0.27 | 0.29 | 0.20 | 0.25 | 0.25 |
| <i>Trypanosoma cruzi</i> -negative 46 | 1.43 | 0.87 | 1.27 | 0.75 | 0.29 | 1.01 | 0.35 | 0.41 | 0.27 | 0.33 | 0.24 | 0.33 | 0.63 | 0.42 | 0.46 | 0.39 |
| <i>Trypanosoma cruzi</i> -positive 01 | 0.28 | 0.27 | 0.32 | 0.31 | 1.04 | 0.66 | 0.82 | 0.79 | 1.81 | 2.44 | 1.95 | 1.16 | 1.26 | 0.62 | 0.60 | 0.54 |

|                                       |      |      |      |      |      |      |      |      |      |      |      |      |      |      |      |      |
|---------------------------------------|------|------|------|------|------|------|------|------|------|------|------|------|------|------|------|------|
| <i>Trypanosoma cruzi</i> -positive 02 | 0.21 | 0.21 | 0.27 | 0.37 | 2.37 | 2.27 | 2.17 | 2.44 | 2.80 | 3.32 | 2.82 | 2.55 | 2.76 | 1.56 | 1.00 | 0.61 |
| <i>Trypanosoma cruzi</i> -positive 03 | 0.24 | 0.28 | 0.31 | 0.33 | 2.00 | 1.99 | 1.55 | 1.75 | 2.49 | 2.99 | 2.95 | 2.25 | 2.19 | 0.88 | 0.60 | 0.53 |
| <i>Trypanosoma cruzi</i> -positive 04 | 0.17 | 0.19 | 0.18 | 0.21 | 2.21 | 2.10 | 1.81 | 1.84 | 2.07 | 2.16 | 1.95 | 1.49 | 1.90 | 0.81 | 0.63 | 0.54 |
| <i>Trypanosoma cruzi</i> -positive 05 | 0.14 | 0.24 | 0.22 | 0.34 | 0.82 | 0.62 | 0.69 | 0.85 | 1.35 | 2.03 | 1.41 | 1.16 | 1.15 | 0.58 | 0.50 | 0.49 |
| <i>Trypanosoma cruzi</i> -positive 06 | 0.20 | 0.22 | 0.32 | 0.21 | 1.66 | 1.88 | 1.55 | 1.46 | 1.78 | 1.99 | 1.62 | 1.44 | 1.65 | 0.60 | 0.50 | 0.44 |
| <i>Trypanosoma cruzi</i> -positive 07 | 0.21 | 0.28 | 0.26 | 0.26 | 1.19 | 1.38 | 1.09 | 1.04 | 1.35 | 1.02 | 1.40 | 1.04 | 1.48 | 0.96 | 0.61 | 0.58 |
| <i>Trypanosoma cruzi</i> -positive 08 | 0.21 | 0.24 | 0.26 | 0.25 | 1.65 | 2.17 | 2.19 | 1.98 | 2.65 | 2.97 | 2.63 | 2.38 | 2.06 | 0.95 | 0.87 | 0.70 |
| <i>Trypanosoma cruzi</i> -positive 09 | 0.21 | 0.23 | 0.30 | 0.27 | 0.88 | 1.10 | 0.82 | 1.33 | 1.65 | 1.77 | 1.97 | 1.41 | 1.26 | 0.40 | 0.31 | 0.24 |
| <i>Trypanosoma cruzi</i> -positive 10 | 0.20 | 0.24 | 0.31 | 0.29 | 1.14 | 1.36 | 1.28 | 1.69 | 1.35 | 1.93 | 1.46 | 1.03 | 1.74 | 0.71 | 0.57 | 0.49 |
| <i>Trypanosoma cruzi</i> -positive 11 | 0.24 | 0.21 | 0.27 | 0.37 | 1.55 | 1.84 | 1.34 | 1.84 | 1.63 | 1.60 | 1.51 | 1.27 | 1.90 | 1.32 | 1.03 | 0.83 |
| <i>Trypanosoma cruzi</i> -positive 12 | 0.21 | 0.22 | 0.26 | 0.30 | 1.60 | 1.73 | 1.56 | 1.69 | 1.79 | 2.20 | 1.85 | 1.38 | 1.60 | 0.57 | 0.46 | 0.42 |
| <i>Trypanosoma cruzi</i> -positive 13 | 0.39 | 0.33 | 0.60 | 0.45 | 0.66 | 0.53 | 0.65 | 0.62 | 0.93 | 1.60 | 0.97 | 0.65 | 0.88 | 0.56 | 0.45 | 0.34 |
| <i>Trypanosoma cruzi</i> -positive 14 | 0.24 | 0.22 | 0.26 | 0.23 | 1.56 | 1.19 | 1.10 | 0.90 | 1.34 | 2.27 | 0.99 | 0.90 | 1.78 | 0.85 | 0.50 | 0.40 |
| <i>Trypanosoma cruzi</i> -positive 15 | 0.23 | 0.24 | 0.34 | 0.22 | 0.74 | 0.48 | 0.45 | 0.31 | 0.91 | 0.92 | 0.70 | 0.53 | 0.73 | 0.29 | 0.33 | 0.28 |
| <i>Trypanosoma cruzi</i> -positive 16 | 0.19 | 0.22 | 0.24 | 0.23 | 2.64 | 2.48 | 2.37 | 2.04 | 2.67 | 3.12 | 2.52 | 2.40 | 2.46 | 1.27 | 0.78 | 0.75 |
| <i>Trypanosoma cruzi</i> -positive 17 | 0.21 | 0.24 | 0.27 | 0.30 | 0.91 | 0.40 | 0.57 | 0.68 | 1.99 | 2.84 | 2.13 | 1.32 | 1.83 | 0.62 | 0.55 | 0.40 |
| <i>Trypanosoma cruzi</i> -positive 18 | 0.18 | 0.19 | 0.27 | 0.24 | 1.60 | 1.56 | 1.38 | 1.56 | 2.08 | 2.27 | 2.10 | 1.59 | 1.61 | 0.91 | 0.78 | 0.72 |
| <i>Trypanosoma cruzi</i> -positive 19 | 0.20 | 0.16 | 0.22 | 0.19 | 1.14 | 1.05 | 0.90 | 0.98 | 0.93 | 1.37 | 0.86 | 0.69 | 1.70 | 0.61 | 0.50 | 0.41 |
| <i>Trypanosoma cruzi</i> -positive 20 | 0.20 | 0.27 | 0.35 | 0.33 | 1.24 | 1.22 | 1.04 | 0.99 | 2.21 | 2.72 | 1.85 | 1.53 | 1.27 | 0.50 | 0.46 | 0.41 |
| <i>Trypanosoma cruzi</i> -positive 21 | 0.24 | 0.27 | 0.33 | 0.21 | 0.80 | 0.59 | 0.48 | 0.46 | 0.48 | 0.85 | 0.61 | 0.42 | 0.95 | 0.35 | 0.27 | 0.27 |
| <i>Trypanosoma cruzi</i> -positive 22 | 0.24 | 0.23 | 0.27 | 0.25 | 2.32 | 2.59 | 2.38 | 2.17 | 2.66 | 3.11 | 2.59 | 2.47 | 2.73 | 1.44 | 0.93 | 0.63 |
| <i>Trypanosoma cruzi</i> -positive 23 | 0.25 | 0.25 | 0.30 | 0.24 | 2.01 | 2.37 | 2.45 | 2.15 | 2.65 | 3.01 | 2.63 | 2.11 | 2.46 | 1.68 | 1.24 | 0.80 |
| <i>Trypanosoma cruzi</i> -positive 24 | 0.27 | 0.31 | 0.42 | 0.34 | 1.44 | 1.19 | 1.15 | 0.73 | 1.74 | 2.27 | 1.33 | 1.11 | 1.43 | 0.36 | 0.32 | 0.29 |
| <i>Trypanosoma cruzi</i> -positive 25 | 0.19 | 0.26 | 0.31 | 0.23 | 0.68 | 0.72 | 0.75 | 1.03 | 0.58 | 1.03 | 0.68 | 0.40 | 0.76 | 0.33 | 0.30 | 0.24 |
| <i>Trypanosoma cruzi</i> -positive 26 | 0.19 | 0.19 | 0.50 | 0.28 | 1.49 | 1.63 | 1.23 | 1.63 | 2.53 | 2.97 | 2.43 | 1.87 | 2.00 | 1.17 | 0.76 | 0.51 |
| <i>Trypanosoma cruzi</i> -positive 27 | 0.24 | 0.26 | 0.32 | 0.34 | 1.90 | 1.92 | 1.64 | 1.86 | 2.42 | 2.65 | 2.54 | 2.06 | 1.96 | 1.06 | 0.85 | 0.53 |
| <i>Trypanosoma cruzi</i> -positive 28 | 0.23 | 0.33 | 0.39 | 0.46 | 1.46 | 0.99 | 1.08 | 0.94 | 1.66 | 2.46 | 1.82 | 1.38 | 1.61 | 0.45 | 0.36 | 0.26 |

|                                       |      |      |      |      |      |      |      |      |      |      |      |      |      |      |      |      |
|---------------------------------------|------|------|------|------|------|------|------|------|------|------|------|------|------|------|------|------|
| <i>Trypanosoma cruzi</i> -positive 29 | 0.27 | 0.26 | 0.40 | 0.18 | 2.39 | 2.05 | 1.72 | 1.58 | 2.16 | 2.98 | 2.43 | 2.05 | 2.45 | 0.88 | 0.58 | 0.39 |
| <i>Trypanosoma cruzi</i> -positive 30 | 0.25 | 0.24 | 0.40 | 0.26 | 2.38 | 2.66 | 1.80 | 2.19 | 2.68 | 3.11 | 2.48 | 2.37 | 2.52 | 1.39 | 0.83 | 0.52 |
| <i>Trypanosoma cruzi</i> -positive 31 | 0.25 | 0.24 | 0.32 | 0.22 | 1.77 | 1.67 | 1.37 | 1.25 | 2.37 | 3.04 | 2.20 | 1.75 | 2.05 | 0.57 | 0.31 | 0.24 |
| <i>Trypanosoma cruzi</i> -positive 32 | 0.19 | 0.18 | 0.31 | 0.20 | 2.32 | 2.36 | 2.08 | 1.87 | 2.55 | 3.03 | 2.22 | 1.94 | 2.36 | 0.94 | 0.66 | 0.35 |
| <i>Trypanosoma cruzi</i> -positive 33 | 0.19 | 0.19 | 0.30 | 0.20 | 1.12 | 1.01 | 1.01 | 1.00 | 1.41 | 2.03 | 1.67 | 1.16 | 1.39 | 0.48 | 0.43 | 0.32 |
| <i>Trypanosoma cruzi</i> -positive 34 | 0.26 | 0.27 | 0.47 | 0.30 | 1.52 | 1.27 | 1.06 | 0.83 | 1.51 | 2.16 | 1.36 | 1.02 | 1.49 | 0.75 | 0.54 | 0.44 |
| <i>Trypanosoma cruzi</i> -positive 35 | 0.34 | 0.32 | 0.42 | 0.32 | 1.25 | 1.18 | 0.93 | 1.02 | 2.19 | 2.79 | 2.02 | 1.95 | 1.77 | 0.74 | 0.52 | 0.45 |
| <i>Trypanosoma cruzi</i> -positive 36 | 0.22 | 0.18 | 0.23 | 0.19 | 1.68 | 2.18 | 1.68 | 1.85 | 2.16 | 2.78 | 2.14 | 2.00 | 2.08 | 0.66 | 0.37 | 0.35 |
| <i>Trypanosoma cruzi</i> -positive 37 | 0.20 | 0.23 | 0.34 | 0.17 | 0.97 | 1.15 | 0.76 | 0.84 | 2.30 | 2.94 | 2.33 | 1.92 | 1.64 | 0.70 | 0.39 | 0.33 |
| <i>Trypanosoma cruzi</i> -positive 38 | 0.22 | 0.23 | 0.27 | 0.21 | 1.38 | 1.77 | 1.07 | 1.38 | 2.31 | 2.74 | 2.26 | 1.98 | 2.10 | 1.35 | 0.63 | 0.56 |
| <i>Trypanosoma cruzi</i> -positive 39 | 0.26 | 0.65 | 0.19 | 0.32 | 1.94 | 1.86 | 1.64 | 1.54 | 2.73 | 2.96 | 2.44 | 2.21 | 2.34 | 0.75 | 0.60 | 0.45 |
| <i>Trypanosoma cruzi</i> -positive 40 | 0.18 | 0.20 | 0.34 | 0.19 | 1.72 | 2.46 | 2.24 | 2.18 | 2.54 | 3.15 | 2.47 | 2.33 | 3.01 | 1.54 | 1.09 | 0.33 |
| <i>Trypanosoma cruzi</i> -positive 41 | 0.24 | 0.21 | 0.26 | 0.20 | 1.53 | 0.92 | 1.04 | 0.84 | 1.74 | 2.59 | 1.59 | 1.22 | 1.44 | 0.36 | 0.38 | 0.16 |
| <i>Trypanosoma cruzi</i> -positive 42 | 0.17 | 0.25 | 0.28 | 0.18 | 1.80 | 1.57 | 1.37 | 1.45 | 2.59 | 3.11 | 1.66 | 1.84 | 1.83 | 1.08 | 0.99 | 0.79 |
| <i>Trypanosoma cruzi</i> -positive 43 | 0.21 | 0.22 | 0.34 | 0.21 | 1.90 | 2.19 | 1.90 | 1.93 | 2.09 | 3.22 | 2.39 | 1.88 | 1.71 | 0.92 | 0.74 | 0.64 |
| <i>Trypanosoma cruzi</i> -positive 44 | 0.21 | 0.15 | 0.29 | 0.21 | 0.93 | 1.05 | 0.81 | 0.96 | 1.32 | 2.16 | 1.15 | 0.91 | 1.32 | 1.04 | 0.83 | 0.55 |
| <i>Trypanosoma cruzi</i> -positive 45 | 0.21 | 0.19 | 0.32 | 0.20 | 1.43 | 1.33 | 1.37 | 1.37 | 2.15 | 3.11 | 2.54 | 1.77 | 1.89 | 0.76 | 0.73 | 0.54 |
| <i>Trypanosoma cruzi</i> -positive 46 | 0.28 | 0.25 | 0.47 | 0.32 | 1.92 | 1.74 | 1.96 | 1.81 | 2.40 | 3.30 | 2.43 | 2.33 | 1.84 | 1.51 | 0.89 | 0.50 |

### Indirect ELISA – IBMP-8.1

| Samples                               | IBMP-8.1                |      |      |      |      |      |      |      |
|---------------------------------------|-------------------------|------|------|------|------|------|------|------|
|                                       | Time of exposure (DAYS) |      |      |      |      |      |      |      |
|                                       | 0                       | 52   | 104  | 156  | 206  | 260  | 312  | 364  |
| <i>Trypanosoma cruzi</i> -negative 01 | 0.24                    | 0.27 | 0.29 | 0.19 | 0.19 | 0.23 | 0.38 | 0.33 |
| <i>Trypanosoma cruzi</i> -negative 02 | 0.36                    | 0.34 | 0.36 | 0.23 | 0.23 | 0.31 | 0.65 | 0.23 |
| <i>Trypanosoma cruzi</i> -negative 03 | 0.26                    | 0.17 | 0.25 | 0.25 | 0.23 | 0.24 | 0.69 | 0.22 |
| <i>Trypanosoma cruzi</i> -negative 04 | 0.30                    | 0.29 | 0.27 | 0.31 | 0.22 | 0.21 | 0.40 | 0.27 |
| <i>Trypanosoma cruzi</i> -negative 05 | 0.27                    | 0.27 | 0.26 | 0.27 | 0.27 | 0.25 | 0.31 | 0.51 |
| <i>Trypanosoma cruzi</i> -negative 06 | 0.43                    | 0.37 | 0.11 | 0.33 | 0.28 | 0.33 | 0.49 | 0.30 |
| <i>Trypanosoma cruzi</i> -negative 07 | 0.29                    | 0.08 | 0.32 | 0.20 | 0.26 | 0.28 | 0.34 | 0.38 |
| <i>Trypanosoma cruzi</i> -negative 08 | 0.32                    | 0.16 | 0.32 | 0.22 | 0.26 | 0.34 | 0.49 | 0.25 |
| <i>Trypanosoma cruzi</i> -negative 09 | 0.19                    | 0.23 | 0.20 | 0.29 | 0.26 | 0.22 | 0.34 | 0.17 |
| <i>Trypanosoma cruzi</i> -negative 10 | 0.30                    | 0.36 | 0.31 | 0.37 | 0.24 | 0.30 | 0.54 | 0.26 |
| <i>Trypanosoma cruzi</i> -negative 11 | 0.28                    | 0.29 | 0.28 | 0.25 | 0.21 | 0.24 | 0.24 | 0.24 |
| <i>Trypanosoma cruzi</i> -negative 12 | 0.38                    | 0.38 | 0.37 | 0.30 | 0.31 | 0.47 | 0.48 | 0.33 |
| <i>Trypanosoma cruzi</i> -negative 13 | 0.33                    | 0.31 | 0.30 | 0.30 | 0.24 | 0.22 | 0.52 | 0.29 |
| <i>Trypanosoma cruzi</i> -negative 14 | 0.22                    | 0.25 | 0.23 | 0.29 | 0.22 | 0.24 | 0.28 | 0.19 |
| <i>Trypanosoma cruzi</i> -negative 15 | 0.37                    | 0.35 | 0.33 | 0.30 | 0.30 | 0.35 | 0.50 | 0.48 |
| <i>Trypanosoma cruzi</i> -negative 16 | 0.31                    | 0.30 | 0.35 | 0.29 | 0.26 | 0.29 | 0.28 | 0.24 |
| <i>Trypanosoma cruzi</i> -negative 17 | 0.27                    | 0.30 | 0.35 | 0.54 | 0.34 | 0.31 | 0.48 | 0.44 |
| <i>Trypanosoma cruzi</i> -negative 18 | 0.29                    | 0.07 | 0.32 | 0.23 | 0.27 | 0.25 | 0.61 | 0.25 |
| <i>Trypanosoma cruzi</i> -negative 19 | 0.24                    | 0.27 | 0.27 | 0.34 | 0.26 | 0.26 | 0.43 | 0.26 |
| <i>Trypanosoma cruzi</i> -negative 20 | 0.31                    | 0.30 | 0.29 | 0.23 | 0.25 | 0.21 | 0.41 | 0.30 |

|                                       |      |      |      |      |      |      |      |      |
|---------------------------------------|------|------|------|------|------|------|------|------|
| <i>Trypanosoma cruzi</i> -negative 21 | 0.39 | 0.08 | 0.39 | 0.15 | 0.30 | 0.40 | 0.29 | 0.30 |
| <i>Trypanosoma cruzi</i> -negative 22 | 0.44 | 0.35 | 0.35 | 0.27 | 0.25 | 0.29 | 0.49 | 0.27 |
| <i>Trypanosoma cruzi</i> -negative 23 | 0.37 | 0.37 | 0.38 | 0.27 | 0.23 | 0.24 | 0.49 | 0.32 |
| <i>Trypanosoma cruzi</i> -negative 24 | 0.27 | 0.27 | 0.26 | 0.30 | 0.26 | 0.21 | 0.39 | 0.23 |
| <i>Trypanosoma cruzi</i> -negative 25 | 0.28 | 0.30 | 0.24 | 0.45 | 0.29 | 0.19 | 0.48 | 0.26 |
| <i>Trypanosoma cruzi</i> -negative 26 | 0.18 | 0.24 | 0.22 | 0.42 | 0.27 | 0.20 | 0.49 | 0.42 |
| <i>Trypanosoma cruzi</i> -negative 27 | 0.29 | 0.07 | 0.30 | 0.25 | 0.26 | 0.30 | 0.44 | 0.28 |
| <i>Trypanosoma cruzi</i> -negative 28 | 0.27 | 0.07 | 0.30 | 0.23 | 0.27 | 0.30 | 0.43 | 0.27 |
| <i>Trypanosoma cruzi</i> -negative 29 | 0.34 | 0.17 | 0.17 | 0.21 | 0.26 | 0.31 | 0.45 | 0.29 |
| <i>Trypanosoma cruzi</i> -negative 30 | 0.34 | 0.40 | 0.35 | 0.22 | 0.35 | 0.26 | 0.42 | 0.29 |
| <i>Trypanosoma cruzi</i> -negative 31 | 0.15 | 0.08 | 0.16 | 0.47 | 0.20 | 0.22 | 0.37 | 0.14 |
| <i>Trypanosoma cruzi</i> -negative 32 | 0.36 | 0.36 | 0.35 | 0.30 | 0.39 | 0.21 | 0.44 | 0.33 |
| <i>Trypanosoma cruzi</i> -negative 33 | 0.21 | 0.17 | 0.22 | 0.24 | 0.45 | 0.47 | 0.32 | 0.20 |
| <i>Trypanosoma cruzi</i> -negative 34 | 0.32 | 0.07 | 0.32 | 0.22 | 0.30 | 0.31 | 0.44 | 0.33 |
| <i>Trypanosoma cruzi</i> -negative 35 | 0.38 | 0.35 | 0.36 | 0.23 | 0.25 | 0.27 | 0.50 | 0.31 |
| <i>Trypanosoma cruzi</i> -negative 36 | 0.33 | 0.34 | 0.39 | 0.29 | 0.26 | 0.23 | 1.03 | 0.27 |
| <i>Trypanosoma cruzi</i> -negative 37 | 0.26 | 0.26 | 0.26 | 0.17 | 0.29 | 0.21 | 0.60 | 0.23 |
| <i>Trypanosoma cruzi</i> -negative 38 | 0.38 | 0.33 | 0.33 | 0.29 | 0.23 | 0.27 | 0.42 | 0.29 |
| <i>Trypanosoma cruzi</i> -negative 39 | 0.30 | 0.29 | 0.27 | 0.21 | 0.24 | 0.29 | 0.42 | 0.22 |
| <i>Trypanosoma cruzi</i> -negative 40 | 0.31 | 0.26 | 0.29 | 0.31 | 0.25 | 0.24 | 0.35 | 0.32 |
| <i>Trypanosoma cruzi</i> -negative 41 | 0.38 | 0.34 | 0.37 | 0.29 | 0.31 | 0.32 | 0.46 | 0.55 |
| <i>Trypanosoma cruzi</i> -negative 42 | 0.31 | 0.30 | 0.27 | 0.26 | 0.30 | 0.24 | 0.42 | 0.49 |
| <i>Trypanosoma cruzi</i> -negative 43 | 0.37 | 0.32 | 0.34 | 0.27 | 0.26 | 0.23 | 0.69 | 0.27 |
| <i>Trypanosoma cruzi</i> -negative 44 | 0.29 | 0.33 | 0.31 | 0.51 | 0.31 | 0.22 | 0.48 | 0.27 |
| <i>Trypanosoma cruzi</i> -negative 45 | 0.28 | 0.27 | 0.25 | 0.31 | 0.39 | 0.26 | 0.45 | 0.26 |

|                                       |      |      |      |      |      |      |      |      |
|---------------------------------------|------|------|------|------|------|------|------|------|
| <i>Trypanosoma cruzi</i> -negative 46 | 0.20 | 0.24 | 0.21 | 0.33 | 0.46 | 0.21 | 0.44 | 0.48 |
| <i>Trypanosoma cruzi</i> -positive 01 | 1.74 | 1.50 | 1.45 | 0.45 | 1.29 | 1.19 | 1.35 | 1.37 |
| <i>Trypanosoma cruzi</i> -positive 02 | 0.62 | 0.41 | 0.35 | 0.92 | 0.51 | 0.35 | 0.49 | 0.30 |
| <i>Trypanosoma cruzi</i> -positive 03 | 0.60 | 0.40 | 0.37 | 0.18 | 1.56 | 0.34 | 0.35 | 0.30 |
| <i>Trypanosoma cruzi</i> -positive 04 | 2.13 | 1.73 | 1.56 | 0.55 | 1.15 | 1.40 | 1.78 | 1.47 |
| <i>Trypanosoma cruzi</i> -positive 05 | 0.67 | 1.13 | 1.09 | 2.17 | 1.41 | 0.89 | 1.18 | 0.91 |
| <i>Trypanosoma cruzi</i> -positive 06 | 2.49 | 2.23 | 1.92 | 2.42 | 0.88 | 1.62 | 2.21 | 1.80 |
| <i>Trypanosoma cruzi</i> -positive 07 | 0.74 | 0.68 | 0.63 | 2.01 | 0.46 | 0.48 | 0.93 | 0.59 |
| <i>Trypanosoma cruzi</i> -positive 08 | 2.53 | 1.97 | 1.87 | 2.30 | 1.24 | 1.58 | 2.02 | 1.66 |
| <i>Trypanosoma cruzi</i> -positive 09 | 2.09 | 2.18 | 1.77 | 1.77 | 0.81 | 1.30 | 2.02 | 1.84 |
| <i>Trypanosoma cruzi</i> -positive 10 | 0.87 | 0.79 | 0.70 | 1.18 | 1.24 | 0.66 | 0.88 | 0.64 |
| <i>Trypanosoma cruzi</i> -positive 11 | 2.31 | 2.01 | 1.79 | 1.52 | 1.24 | 1.58 | 1.93 | 1.81 |
| <i>Trypanosoma cruzi</i> -positive 12 | 1.15 | 1.19 | 1.09 | 0.38 | 1.41 | 0.88 | 1.26 | 1.02 |
| <i>Trypanosoma cruzi</i> -positive 13 | 1.68 | 1.56 | 1.47 | 0.93 | 1.26 | 1.42 | 1.72 | 1.34 |
| <i>Trypanosoma cruzi</i> -positive 14 | 2.03 | 1.83 | 1.66 | 2.87 | 1.49 | 1.65 | 1.99 | 1.60 |
| <i>Trypanosoma cruzi</i> -positive 15 | 2.63 | 2.46 | 2.12 | 0.78 | 1.65 | 2.11 | 2.25 | 2.10 |
| <i>Trypanosoma cruzi</i> -positive 16 | 2.07 | 2.05 | 1.74 | 1.19 | 0.45 | 0.46 | 1.91 | 1.73 |
| <i>Trypanosoma cruzi</i> -positive 17 | 1.37 | 1.29 | 1.09 | 0.92 | 1.14 | 0.92 | 1.07 | 1.00 |
| <i>Trypanosoma cruzi</i> -positive 18 | 1.40 | 1.26 | 1.21 | 1.61 | 0.92 | 0.89 | 1.28 | 1.09 |
| <i>Trypanosoma cruzi</i> -positive 19 | 1.39 | 1.20 | 1.04 | 1.49 | 1.03 | 0.83 | 1.23 | 1.79 |
| <i>Trypanosoma cruzi</i> -positive 20 | 1.16 | 1.02 | 1.01 | 1.63 | 1.19 | 0.88 | 1.14 | 0.98 |
| <i>Trypanosoma cruzi</i> -positive 21 | 2.09 | 0.37 | 1.82 | 1.57 | 1.82 | 1.59 | 1.34 | 0.92 |
| <i>Trypanosoma cruzi</i> -positive 22 | 2.15 | 2.01 | 1.59 | 2.75 | 0.98 | 1.39 | 1.60 | 1.65 |
| <i>Trypanosoma cruzi</i> -positive 23 | 3.03 | 2.55 | 2.26 | 1.04 | 1.91 | 2.25 | 2.55 | 1.64 |
| <i>Trypanosoma cruzi</i> -positive 24 | 2.74 | 2.36 | 2.14 | 2.03 | 2.12 | 1.99 | 2.58 | 2.30 |



|                                       |      |      |      |      |      |      |      |      |
|---------------------------------------|------|------|------|------|------|------|------|------|
| <i>Trypanosoma cruzi</i> -positive 25 | 2.27 | 2.09 | 1.85 | 1.74 | 1.64 | 1.65 | 2.09 | 1.23 |
| <i>Trypanosoma cruzi</i> -positive 26 | 2.28 | 2.16 | 1.81 | 0.98 | 1.68 | 1.89 | 2.13 | 1.99 |
| <i>Trypanosoma cruzi</i> -positive 27 | 2.19 | 2.19 | 1.97 | 1.57 | 2.03 | 1.85 | 2.00 | 1.87 |
| <i>Trypanosoma cruzi</i> -positive 28 | 1.20 | 1.16 | 1.07 | 1.12 | 1.85 | 0.83 | 1.03 | 0.98 |
| <i>Trypanosoma cruzi</i> -positive 29 | 0.72 | 0.82 | 0.75 | 0.97 | 0.90 | 0.53 | 0.91 | 0.57 |
| <i>Trypanosoma cruzi</i> -positive 30 | 1.19 | 1.49 | 0.97 | 0.50 | 1.12 | 0.80 | 1.25 | 0.91 |
| <i>Trypanosoma cruzi</i> -positive 31 | 2.72 | 2.53 | 2.03 | 2.07 | 1.95 | 2.11 | 2.33 | 2.13 |
| <i>Trypanosoma cruzi</i> -positive 32 | 0.71 | 0.64 | 1.55 | 1.72 | 1.59 | 0.41 | 0.65 | 0.37 |
| <i>Trypanosoma cruzi</i> -positive 33 | 1.31 | 1.20 | 1.25 | 1.69 | 1.14 | 0.95 | 1.17 | 0.86 |
| <i>Trypanosoma cruzi</i> -positive 34 | 3.07 | 0.92 | 2.36 | 2.45 | 1.80 | 2.20 | 2.74 | 2.20 |
| <i>Trypanosoma cruzi</i> -positive 35 | 2.48 | 2.23 | 1.90 | 1.72 | 1.24 | 1.65 | 1.94 | 1.91 |
| <i>Trypanosoma cruzi</i> -positive 36 | 0.56 | 0.31 | 0.35 | 1.75 | 1.85 | 0.40 | 0.58 | 0.28 |
| <i>Trypanosoma cruzi</i> -positive 37 | 2.69 | 2.69 | 2.11 | 2.58 | 2.12 | 2.17 | 2.35 | 1.23 |
| <i>Trypanosoma cruzi</i> -positive 38 | 1.19 | 1.25 | 1.02 | 0.63 | 1.26 | 0.86 | 0.89 | 0.95 |
| <i>Trypanosoma cruzi</i> -positive 39 | 0.66 | 0.54 | 0.46 | 1.49 | 1.63 | 0.41 | 0.61 | 0.40 |
| <i>Trypanosoma cruzi</i> -positive 40 | 1.46 | 1.06 | 0.75 | 1.83 | 0.96 | 0.75 | 1.04 | 0.89 |
| <i>Trypanosoma cruzi</i> -positive 41 | 2.14 | 2.05 | 1.69 | 0.99 | 1.55 | 1.43 | 2.10 | 1.55 |
| <i>Trypanosoma cruzi</i> -positive 42 | 3.15 | 0.92 | 2.41 | 1.78 | 2.18 | 2.38 | 3.05 | 1.46 |
| <i>Trypanosoma cruzi</i> -positive 43 | 1.33 | 1.19 | 0.97 | 2.39 | 1.19 | 0.52 | 1.14 | 0.89 |
| <i>Trypanosoma cruzi</i> -positive 44 | 2.08 | 1.41 | 1.44 | 1.41 | 1.69 | 1.24 | 1.75 | 1.43 |
| <i>Trypanosoma cruzi</i> -positive 45 | 1.41 | 1.40 | 1.20 | 1.99 | 1.70 | 0.84 | 1.57 | 1.21 |
| <i>Trypanosoma cruzi</i> -positive 46 | 2.09 | 1.96 | 1.59 | 1.97 | 2.28 | 1.23 | 1.64 | 1.62 |

### Indirect ELISA – IBMP-8.2

| Samples                               | IBMP-8.2                |      |      |      |      |      |      |      |
|---------------------------------------|-------------------------|------|------|------|------|------|------|------|
|                                       | Time of exposure (DAYS) |      |      |      |      |      |      |      |
|                                       | 0                       | 52   | 104  | 156  | 206  | 260  | 312  | 364  |
| <i>Trypanosoma cruzi</i> -negative 01 | 0.36                    | 0.36 | 0.27 | 0.39 | 0.39 | 0.20 | 0.39 | 0.37 |
| <i>Trypanosoma cruzi</i> -negative 02 | 0.48                    | 0.45 | 0.34 | 0.40 | 0.36 | 0.31 | 0.62 | 0.57 |
| <i>Trypanosoma cruzi</i> -negative 03 | 0.40                    | 0.33 | 0.28 | 0.27 | 0.26 | 0.25 | 0.92 | 0.17 |
| <i>Trypanosoma cruzi</i> -negative 04 | 0.37                    | 0.31 | 0.29 | 0.30 | 0.28 | 0.27 | 0.38 | 0.16 |
| <i>Trypanosoma cruzi</i> -negative 05 | 0.36                    | 0.32 | 0.23 | 0.25 | 0.23 | 0.22 | 0.48 | 0.15 |
| <i>Trypanosoma cruzi</i> -negative 06 | 0.63                    | 0.48 | 0.40 | 0.33 | 0.31 | 0.29 | 0.72 | 0.25 |
| <i>Trypanosoma cruzi</i> -negative 07 | 0.45                    | 0.39 | 0.29 | 0.29 | 0.28 | 0.28 | 0.53 | 0.18 |
| <i>Trypanosoma cruzi</i> -negative 08 | 0.38                    | 0.31 | 0.27 | 0.31 | 0.30 | 0.29 | 0.37 | 0.15 |
| <i>Trypanosoma cruzi</i> -negative 09 | 0.25                    | 0.22 | 0.17 | 0.23 | 0.22 | 0.21 | 0.34 | 0.12 |
| <i>Trypanosoma cruzi</i> -negative 10 | 0.39                    | 0.32 | 0.26 | 0.32 | 0.30 | 0.27 | 0.49 | 0.24 |
| <i>Trypanosoma cruzi</i> -negative 11 | 0.50                    | 0.39 | 0.24 | 0.32 | 0.27 | 0.21 | 0.56 | 0.18 |
| <i>Trypanosoma cruzi</i> -negative 12 | 0.50                    | 0.42 | 0.32 | 0.37 | 0.34 | 0.32 | 0.48 | 0.19 |
| <i>Trypanosoma cruzi</i> -negative 13 | 0.42                    | 0.39 | 0.29 | 0.27 | 0.27 | 0.27 | 0.45 | 0.50 |
| <i>Trypanosoma cruzi</i> -negative 14 | 0.35                    | 0.27 | 0.20 | 0.24 | 0.24 | 0.25 | 0.20 | 0.53 |
| <i>Trypanosoma cruzi</i> -negative 15 | 0.63                    | 0.51 | 0.46 | 0.44 | 0.43 | 0.42 | 0.72 | 0.23 |
| <i>Trypanosoma cruzi</i> -negative 16 | 0.38                    | 0.36 | 0.30 | 0.28 | 0.27 | 0.26 | 0.48 | 0.17 |
| <i>Trypanosoma cruzi</i> -negative 17 | 0.49                    | 0.37 | 0.28 | 0.29 | 0.28 | 0.27 | 0.51 | 0.24 |
| <i>Trypanosoma cruzi</i> -negative 18 | 0.32                    | 0.32 | 0.26 | 0.27 | 0.25 | 0.24 | 0.36 | 0.19 |
| <i>Trypanosoma cruzi</i> -negative 19 | 0.38                    | 0.30 | 0.25 | 0.24 | 0.23 | 0.23 | 0.37 | 0.42 |
| <i>Trypanosoma cruzi</i> -negative 20 | 0.44                    | 0.30 | 0.27 | 0.28 | 0.26 | 0.25 | 0.64 | 0.56 |

|                                       |      |      |      |      |      |      |      |      |
|---------------------------------------|------|------|------|------|------|------|------|------|
| <i>Trypanosoma cruzi</i> -negative 21 | 0.48 | 0.40 | 0.34 | 0.37 | 0.34 | 0.31 | 0.60 | 0.58 |
| <i>Trypanosoma cruzi</i> -negative 22 | 0.39 | 0.33 | 0.27 | 0.31 | 0.27 | 0.23 | 0.42 | 0.18 |
| <i>Trypanosoma cruzi</i> -negative 23 | 0.55 | 0.47 | 0.37 | 0.39 | 0.37 | 0.34 | 0.55 | 0.45 |
| <i>Trypanosoma cruzi</i> -negative 24 | 0.33 | 0.28 | 0.23 | 0.24 | 0.23 | 0.22 | 0.38 | 0.14 |
| <i>Trypanosoma cruzi</i> -negative 25 | 0.43 | 0.29 | 0.21 | 0.26 | 0.23 | 0.20 | 0.39 | 0.16 |
| <i>Trypanosoma cruzi</i> -negative 26 | 0.23 | 0.24 | 0.15 | 0.22 | 0.20 | 0.17 | 0.31 | 0.42 |
| <i>Trypanosoma cruzi</i> -negative 27 | 0.44 | 0.39 | 0.32 | 0.32 | 0.30 | 0.28 | 0.48 | 0.58 |
| <i>Trypanosoma cruzi</i> -negative 28 | 0.30 | 0.31 | 0.24 | 0.28 | 0.26 | 0.24 | 0.24 | 0.34 |
| <i>Trypanosoma cruzi</i> -negative 29 | 0.44 | 0.39 | 0.29 | 0.38 | 0.32 | 0.27 | 0.54 | 0.21 |
| <i>Trypanosoma cruzi</i> -negative 30 | 0.60 | 0.48 | 0.38 | 0.36 | 0.34 | 0.32 | 0.55 | 0.23 |
| <i>Trypanosoma cruzi</i> -negative 31 | 0.16 | 0.17 | 0.13 | 0.15 | 0.20 | 0.24 | 0.50 | 0.59 |
| <i>Trypanosoma cruzi</i> -negative 32 | 0.52 | 0.41 | 0.35 | 0.34 | 0.34 | 0.33 | 0.57 | 0.23 |
| <i>Trypanosoma cruzi</i> -negative 33 | 0.36 | 0.31 | 0.27 | 0.28 | 0.42 | 0.42 | 0.25 | 0.35 |
| <i>Trypanosoma cruzi</i> -negative 34 | 0.40 | 0.36 | 0.30 | 0.30 | 0.28 | 0.27 | 0.52 | 0.57 |
| <i>Trypanosoma cruzi</i> -negative 35 | 0.68 | 0.54 | 0.45 | 0.36 | 0.36 | 0.35 | 0.74 | 0.27 |
| <i>Trypanosoma cruzi</i> -negative 36 | 0.70 | 0.30 | 0.33 | 0.25 | 0.23 | 0.20 | 0.45 | 0.47 |
| <i>Trypanosoma cruzi</i> -negative 37 | 0.48 | 0.39 | 0.32 | 0.32 | 0.30 | 0.29 | 0.47 | 0.50 |
| <i>Trypanosoma cruzi</i> -negative 38 | 0.52 | 0.40 | 0.36 | 0.40 | 0.38 | 0.36 | 0.63 | 0.21 |
| <i>Trypanosoma cruzi</i> -negative 39 | 0.58 | 0.43 | 0.37 | 0.38 | 0.34 | 0.40 | 0.64 | 0.22 |
| <i>Trypanosoma cruzi</i> -negative 40 | 0.43 | 0.34 | 0.28 | 0.32 | 0.29 | 0.26 | 0.45 | 0.20 |
| <i>Trypanosoma cruzi</i> -negative 41 | 0.75 | 0.37 | 0.36 | 0.34 | 0.32 | 0.30 | 0.46 | 0.23 |
| <i>Trypanosoma cruzi</i> -negative 42 | 0.49 | 0.46 | 0.29 | 0.41 | 0.34 | 0.28 | 0.49 | 0.23 |
| <i>Trypanosoma cruzi</i> -negative 43 | 0.50 | 0.41 | 0.33 | 0.34 | 0.31 | 0.28 | 0.54 | 0.22 |
| <i>Trypanosoma cruzi</i> -negative 44 | 0.40 | 0.30 | 0.27 | 0.28 | 0.26 | 0.24 | 0.37 | 0.19 |
| <i>Trypanosoma cruzi</i> -negative 45 | 0.41 | 0.31 | 0.28 | 0.28 | 0.28 | 0.28 | 0.46 | 0.19 |

|                                       |      |      |      |      |      |      |      |      |
|---------------------------------------|------|------|------|------|------|------|------|------|
| <i>Trypanosoma cruzi</i> -negative 46 | 0.27 | 0.23 | 0.22 | 0.23 | 0.22 | 0.21 | 0.33 | 0.12 |
| <i>Trypanosoma cruzi</i> -positive 01 | 2.09 | 1.92 | 1.55 | 1.82 | 1.56 | 1.30 | 1.85 | 1.70 |
| <i>Trypanosoma cruzi</i> -positive 02 | 0.79 | 0.70 | 0.51 | 0.55 | 0.48 | 0.41 | 0.87 | 0.33 |
| <i>Trypanosoma cruzi</i> -positive 03 | 0.87 | 0.51 | 0.39 | 0.41 | 0.39 | 0.37 | 0.72 | 0.25 |
| <i>Trypanosoma cruzi</i> -positive 04 | 1.85 | 1.72 | 1.35 | 1.43 | 1.22 | 1.01 | 1.67 | 1.06 |
| <i>Trypanosoma cruzi</i> -positive 05 | 0.99 | 0.94 | 0.68 | 0.65 | 0.62 | 0.60 | 1.04 | 0.45 |
| <i>Trypanosoma cruzi</i> -positive 06 | 1.55 | 1.37 | 1.17 | 1.18 | 1.04 | 0.90 | 1.51 | 0.87 |
| <i>Trypanosoma cruzi</i> -positive 07 | 0.83 | 0.76 | 0.61 | 0.59 | 0.53 | 0.46 | 1.00 | 0.34 |
| <i>Trypanosoma cruzi</i> -positive 08 | 1.54 | 1.34 | 1.14 | 0.11 | 0.46 | 0.80 | 1.48 | 0.82 |
| <i>Trypanosoma cruzi</i> -positive 09 | 1.89 | 1.88 | 1.41 | 1.36 | 1.17 | 0.97 | 1.91 | 0.95 |
| <i>Trypanosoma cruzi</i> -positive 10 | 1.20 | 0.95 | 0.83 | 0.88 | 0.78 | 0.69 | 1.07 | 0.73 |
| <i>Trypanosoma cruzi</i> -positive 11 | 2.22 | 1.92 | 1.59 | 1.31 | 1.18 | 1.06 | 2.04 | 1.23 |
| <i>Trypanosoma cruzi</i> -positive 12 | 1.04 | 1.06 | 0.81 | 0.67 | 0.66 | 0.65 | 1.01 | 0.66 |
| <i>Trypanosoma cruzi</i> -positive 13 | 0.85 | 0.85 | 0.68 | 0.68 | 0.64 | 0.60 | 1.10 | 0.51 |
| <i>Trypanosoma cruzi</i> -positive 14 | 1.09 | 1.03 | 0.78 | 0.71 | 0.67 | 0.62 | 1.10 | 0.48 |
| <i>Trypanosoma cruzi</i> -positive 15 | 2.00 | 1.87 | 1.43 | 1.53 | 1.36 | 1.20 | 1.91 | 0.86 |
| <i>Trypanosoma cruzi</i> -positive 16 | 1.34 | 1.26 | 1.03 | 1.08 | 0.61 | 0.13 | 1.32 | 0.53 |
| <i>Trypanosoma cruzi</i> -positive 17 | 1.25 | 1.15 | 0.99 | 0.93 | 0.84 | 0.74 | 1.28 | 0.55 |
| <i>Trypanosoma cruzi</i> -positive 18 | 0.82 | 0.56 | 0.51 | 0.61 | 0.49 | 0.36 | 0.64 | 0.30 |
| <i>Trypanosoma cruzi</i> -positive 19 | 0.85 | 0.46 | 0.36 | 0.34 | 0.31 | 0.29 | 0.55 | 0.72 |
| <i>Trypanosoma cruzi</i> -positive 20 | 0.85 | 0.58 | 0.53 | 0.48 | 0.45 | 0.42 | 0.69 | 0.27 |
| <i>Trypanosoma cruzi</i> -positive 21 | 1.93 | 1.72 | 1.39 | 1.35 | 1.23 | 1.12 | 0.18 | 0.33 |
| <i>Trypanosoma cruzi</i> -positive 22 | 2.46 | 2.33 | 1.88 | 1.95 | 1.78 | 1.60 | 2.32 | 1.07 |
| <i>Trypanosoma cruzi</i> -positive 23 | 1.66 | 1.66 | 1.41 | 1.47 | 1.26 | 1.06 | 1.73 | 1.99 |
| <i>Trypanosoma cruzi</i> -positive 24 | 2.66 | 2.46 | 2.00 | 2.06 | 1.80 | 1.54 | 2.44 | 1.26 |

|                                       |      |      |      |      |      |      |      |      |
|---------------------------------------|------|------|------|------|------|------|------|------|
| <i>Trypanosoma cruzi</i> -positive 25 | 1.11 | 1.02 | 0.86 | 0.73 | 0.74 | 0.74 | 1.42 | 1.76 |
| <i>Trypanosoma cruzi</i> -positive 26 | 1.91 | 1.69 | 1.41 | 1.55 | 1.34 | 1.13 | 1.67 | 1.36 |
| <i>Trypanosoma cruzi</i> -positive 27 | 3.04 | 2.68 | 2.17 | 2.37 | 2.06 | 1.75 | 2.88 | 2.07 |
| <i>Trypanosoma cruzi</i> -positive 28 | 1.03 | 0.89 | 0.79 | 0.58 | 0.53 | 0.48 | 0.89 | 0.37 |
| <i>Trypanosoma cruzi</i> -positive 29 | 0.85 | 0.83 | 0.76 | 0.65 | 0.59 | 0.53 | 0.84 | 0.46 |
| <i>Trypanosoma cruzi</i> -positive 30 | 0.87 | 0.43 | 0.33 | 0.34 | 0.32 | 0.29 | 0.58 | 0.21 |
| <i>Trypanosoma cruzi</i> -positive 31 | 2.74 | 2.56 | 2.03 | 2.09 | 1.85 | 1.60 | 2.50 | 1.95 |
| <i>Trypanosoma cruzi</i> -positive 32 | 0.84 | 0.44 | 0.38 | 0.42 | 0.37 | 0.32 | 0.63 | 0.30 |
| <i>Trypanosoma cruzi</i> -positive 33 | 2.16 | 2.16 | 1.75 | 1.78 | 1.51 | 1.23 | 2.16 | 1.52 |
| <i>Trypanosoma cruzi</i> -positive 34 | 2.33 | 2.05 | 1.92 | 1.63 | 1.45 | 1.27 | 1.95 | 1.58 |
| <i>Trypanosoma cruzi</i> -positive 35 | 2.72 | 2.34 | 2.15 | 2.07 | 1.80 | 1.53 | 2.42 | 1.86 |
| <i>Trypanosoma cruzi</i> -positive 36 | 0.84 | 0.40 | 0.29 | 0.27 | 0.24 | 0.21 | 0.55 | 0.22 |
| <i>Trypanosoma cruzi</i> -positive 37 | 2.79 | 2.67 | 2.04 | 2.21 | 1.89 | 1.56 | 2.50 | 1.97 |
| <i>Trypanosoma cruzi</i> -positive 38 | 1.71 | 1.83 | 1.22 | 1.23 | 1.13 | 1.02 | 1.46 | 1.03 |
| <i>Trypanosoma cruzi</i> -positive 39 | 0.88 | 0.52 | 0.48 | 0.45 | 0.46 | 0.47 | 0.66 | 0.29 |
| <i>Trypanosoma cruzi</i> -positive 40 | 1.11 | 1.05 | 0.90 | 1.31 | 1.13 | 0.95 | 1.08 | 1.28 |
| <i>Trypanosoma cruzi</i> -positive 41 | 1.31 | 1.27 | 0.99 | 0.94 | 0.85 | 0.77 | 1.35 | 0.87 |
| <i>Trypanosoma cruzi</i> -positive 42 | 2.32 | 2.35 | 1.86 | 1.96 | 1.69 | 1.42 | 2.30 | 1.82 |
| <i>Trypanosoma cruzi</i> -positive 43 | 0.81 | 0.57 | 0.48 | 0.42 | 0.39 | 0.36 | 0.73 | 0.28 |
| <i>Trypanosoma cruzi</i> -positive 44 | 2.18 | 1.95 | 1.56 | 1.43 | 1.32 | 1.20 | 2.04 | 1.24 |
| <i>Trypanosoma cruzi</i> -positive 45 | 0.89 | 0.80 | 0.68 | 0.60 | 0.55 | 0.51 | 1.01 | 0.48 |
| <i>Trypanosoma cruzi</i> -positive 46 | 0.84 | 0.86 | 0.65 | 0.58 | 0.51 | 0.44 | 0.87 | 0.38 |

### Indirect ELISA – IBMP-8.3

| Samples                               | IBMP-8.3                |      |      |      |      |      |      |      |
|---------------------------------------|-------------------------|------|------|------|------|------|------|------|
|                                       | Time of exposure (DAYS) |      |      |      |      |      |      |      |
|                                       | 0                       | 52   | 104  | 156  | 206  | 260  | 312  | 364  |
| <i>Trypanosoma cruzi</i> -negative 01 | 0.25                    | 0.32 | 0.31 | 0.29 | 0.19 | 0.25 | 0.31 | 0.32 |
| <i>Trypanosoma cruzi</i> -negative 02 | 0.50                    | 0.48 | 0.45 | 0.41 | 0.31 | 0.66 | 0.24 | 0.41 |
| <i>Trypanosoma cruzi</i> -negative 03 | 0.27                    | 0.28 | 0.27 | 0.30 | 0.23 | 0.28 | 0.57 | 0.17 |
| <i>Trypanosoma cruzi</i> -negative 04 | 0.43                    | 0.36 | 0.36 | 0.43 | 0.32 | 0.36 | 0.35 | 0.32 |
| <i>Trypanosoma cruzi</i> -negative 05 | 0.36                    | 0.23 | 0.49 | 0.30 | 0.26 | 0.34 | 0.51 | 0.25 |
| <i>Trypanosoma cruzi</i> -negative 06 | 0.50                    | 0.30 | 0.49 | 0.40 | 0.31 | 0.38 | 0.57 | 0.23 |
| <i>Trypanosoma cruzi</i> -negative 07 | 0.37                    | 0.37 | 0.32 | 0.35 | 0.27 | 0.46 | 0.39 | 0.25 |
| <i>Trypanosoma cruzi</i> -negative 08 | 0.34                    | 0.31 | 0.35 | 0.34 | 0.28 | 0.50 | 0.29 | 0.21 |
| <i>Trypanosoma cruzi</i> -negative 09 | 0.23                    | 0.26 | 0.19 | 0.27 | 0.27 | 0.42 | 0.21 | 0.14 |
| <i>Trypanosoma cruzi</i> -negative 10 | 0.39                    | 0.34 | 0.33 | 0.37 | 0.33 | 0.60 | 0.20 | 0.19 |
| <i>Trypanosoma cruzi</i> -negative 11 | 0.55                    | 0.49 | 0.42 | 0.43 | 0.37 | 0.38 | 0.53 | 0.34 |
| <i>Trypanosoma cruzi</i> -negative 12 | 0.52                    | 0.50 | 0.61 | 0.51 | 0.41 | 0.49 | 0.27 | 0.31 |
| <i>Trypanosoma cruzi</i> -negative 13 | 0.43                    | 0.46 | 0.34 | 0.44 | 0.37 | 0.36 | 0.35 | 0.27 |
| <i>Trypanosoma cruzi</i> -negative 14 | 0.29                    | 0.25 | 0.24 | 0.29 | 0.29 | 0.26 | 0.09 | 0.23 |
| <i>Trypanosoma cruzi</i> -negative 15 | 0.58                    | 0.46 | 0.52 | 0.55 | 0.46 | 0.50 | 0.38 | 0.51 |
| <i>Trypanosoma cruzi</i> -negative 16 | 0.35                    | 0.40 | 0.35 | 0.36 | 0.35 | 0.42 | 0.36 | 0.22 |
| <i>Trypanosoma cruzi</i> -negative 17 | 0.43                    | 0.36 | 0.29 | 0.42 | 0.38 | 0.38 | 0.41 | 0.33 |
| <i>Trypanosoma cruzi</i> -negative 18 | 0.42                    | 0.39 | 0.35 | 0.37 | 0.37 | 0.53 | 0.29 | 0.45 |
| <i>Trypanosoma cruzi</i> -negative 19 | 0.27                    | 0.29 | 0.32 | 0.32 | 0.32 | 0.33 | 0.25 | 0.33 |
| <i>Trypanosoma cruzi</i> -negative 20 | 0.31                    | 0.26 | 0.27 | 0.35 | 0.36 | 0.33 | 0.28 | 0.20 |

|                                       |      |      |      |      |      |      |      |      |
|---------------------------------------|------|------|------|------|------|------|------|------|
| <i>Trypanosoma cruzi</i> -negative 21 | 0.68 | 0.62 | 0.63 | 0.53 | 0.47 | 0.56 | 0.30 | 0.24 |
| <i>Trypanosoma cruzi</i> -negative 22 | 0.52 | 0.57 | 0.40 | 0.46 | 0.40 | 0.43 | 0.45 | 0.27 |
| <i>Trypanosoma cruzi</i> -negative 23 | 0.47 | 0.40 | 0.36 | 0.47 | 0.42 | 0.40 | 0.41 | 0.42 |
| <i>Trypanosoma cruzi</i> -negative 24 | 0.30 | 0.31 | 0.26 | 0.29 | 0.32 | 0.25 | 0.21 | 0.38 |
| <i>Trypanosoma cruzi</i> -negative 25 | 0.29 | 0.47 | 0.24 | 0.16 | 0.24 | 0.48 | 0.60 | 0.21 |
| <i>Trypanosoma cruzi</i> -negative 26 | 0.49 | 0.39 | 0.30 | 0.31 | 0.35 | 0.26 | 0.21 | 0.40 |
| <i>Trypanosoma cruzi</i> -negative 27 | 0.37 | 0.45 | 0.45 | 0.39 | 0.38 | 0.55 | 0.33 | 0.36 |
| <i>Trypanosoma cruzi</i> -negative 28 | 0.33 | 0.35 | 0.29 | 0.30 | 0.35 | 0.55 | 0.42 | 0.22 |
| <i>Trypanosoma cruzi</i> -negative 29 | 0.34 | 0.32 | 0.34 | 0.36 | 0.37 | 0.36 | 0.32 | 0.31 |
| <i>Trypanosoma cruzi</i> -negative 30 | 0.43 | 0.41 | 0.38 | 0.44 | 0.45 | 0.41 | 0.36 | 0.25 |
| <i>Trypanosoma cruzi</i> -negative 31 | 0.17 | 0.17 | 0.16 | 0.24 | 0.31 | 0.53 | 0.19 | 0.31 |
| <i>Trypanosoma cruzi</i> -negative 32 | 0.50 | 0.38 | 0.43 | 0.42 | 0.41 | 0.38 | 0.37 | 0.28 |
| <i>Trypanosoma cruzi</i> -negative 33 | 0.24 | 0.23 | 0.22 | 0.24 | 0.34 | 0.23 | 0.25 | 0.15 |
| <i>Trypanosoma cruzi</i> -negative 34 | 0.66 | 0.58 | 0.58 | 0.51 | 0.53 | 0.50 | 0.28 | 0.36 |
| <i>Trypanosoma cruzi</i> -negative 35 | 0.50 | 0.41 | 0.41 | 0.38 | 0.44 | 0.38 | 0.35 | 0.39 |
| <i>Trypanosoma cruzi</i> -negative 36 | 0.42 | 0.77 | 0.37 | 0.30 | 0.39 | 0.36 | 0.42 | 0.26 |
| <i>Trypanosoma cruzi</i> -negative 37 | 0.38 | 0.26 | 0.24 | 0.30 | 0.40 | 0.23 | 0.31 | 0.41 |
| <i>Trypanosoma cruzi</i> -negative 38 | 0.49 | 0.38 | 0.40 | 0.45 | 0.51 | 0.43 | 0.25 | 0.29 |
| <i>Trypanosoma cruzi</i> -negative 39 | 0.44 | 0.34 | 0.39 | 0.38 | 0.46 | 0.39 | 0.34 | 0.26 |
| <i>Trypanosoma cruzi</i> -negative 40 | 0.41 | 0.37 | 0.33 | 0.37 | 0.47 | 0.33 | 0.51 | 0.57 |
| <i>Trypanosoma cruzi</i> -negative 41 | 0.62 | 0.59 | 0.50 | 0.55 | 0.65 | 0.49 | 0.50 | 0.35 |
| <i>Trypanosoma cruzi</i> -negative 42 | 0.38 | 0.36 | 0.34 | 0.36 | 0.49 | 0.40 | 0.28 | 0.24 |
| <i>Trypanosoma cruzi</i> -negative 43 | 0.43 | 0.39 | 0.40 | 0.35 | 0.48 | 0.34 | 0.47 | 0.27 |
| <i>Trypanosoma cruzi</i> -negative 44 | 0.33 | 0.31 | 0.27 | 0.29 | 0.54 | 0.33 | 0.28 | 0.31 |
| <i>Trypanosoma cruzi</i> -negative 45 | 0.38 | 0.35 | 0.31 | 0.36 | 0.64 | 0.35 | 0.25 | 0.28 |

|                                       |      |      |      |      |      |      |      |      |
|---------------------------------------|------|------|------|------|------|------|------|------|
| <i>Trypanosoma cruzi</i> -negative 46 | 0.23 | 0.25 | 0.21 | 0.28 | 0.64 | 0.27 | 0.36 | 0.46 |
| <i>Trypanosoma cruzi</i> -positive 01 | 2.51 | 2.30 | 2.11 | 2.68 | 0.91 | 1.88 | 1.92 | 1.73 |
| <i>Trypanosoma cruzi</i> -positive 02 | 1.42 | 1.28 | 1.23 | 1.29 | 0.38 | 0.92 | 0.98 | 0.90 |
| <i>Trypanosoma cruzi</i> -positive 03 | 0.83 | 0.31 | 0.30 | 0.38 | 0.33 | 0.35 | 0.37 | 0.20 |
| <i>Trypanosoma cruzi</i> -positive 04 | 2.62 | 2.08 | 1.93 | 2.44 | 1.16 | 1.74 | 2.08 | 1.76 |
| <i>Trypanosoma cruzi</i> -positive 05 | 2.81 | 2.24 | 2.06 | 2.40 | 1.04 | 1.82 | 2.13 | 1.78 |
| <i>Trypanosoma cruzi</i> -positive 06 | 2.06 | 1.97 | 1.82 | 2.04 | 0.91 | 1.46 | 1.34 | 1.48 |
| <i>Trypanosoma cruzi</i> -positive 07 | 0.79 | 0.65 | 0.56 | 0.60 | 0.51 | 0.65 | 0.47 | 0.47 |
| <i>Trypanosoma cruzi</i> -positive 08 | 2.16 | 1.88 | 1.75 | 1.98 | 1.19 | 1.46 | 1.35 | 1.50 |
| <i>Trypanosoma cruzi</i> -positive 09 | 2.77 | 2.63 | 2.20 | 2.82 | 1.64 | 1.92 | 1.98 | 2.08 |
| <i>Trypanosoma cruzi</i> -positive 10 | 1.23 | 1.06 | 1.10 | 1.00 | 0.73 | 0.91 | 0.67 | 0.73 |
| <i>Trypanosoma cruzi</i> -positive 11 | 3.30 | 2.62 | 2.44 | 3.08 | 1.68 | 2.18 | 2.88 | 2.30 |
| <i>Trypanosoma cruzi</i> -positive 12 | 0.85 | 0.39 | 0.38 | 0.41 | 0.67 | 0.42 | 0.32 | 0.28 |
| <i>Trypanosoma cruzi</i> -positive 13 | 1.67 | 1.57 | 1.49 | 1.64 | 1.14 | 1.23 | 1.10 | 1.24 |
| <i>Trypanosoma cruzi</i> -positive 14 | 1.54 | 1.35 | 1.35 | 1.32 | 1.11 | 1.00 | 0.98 | 1.06 |
| <i>Trypanosoma cruzi</i> -positive 15 | 2.98 | 2.23 | 2.23 | 3.08 | 1.93 | 1.95 | 2.35 | 2.11 |
| <i>Trypanosoma cruzi</i> -positive 16 | 2.02 | 1.95 | 1.85 | 2.23 | 1.66 | 0.17 | 1.77 | 1.38 |
| <i>Trypanosoma cruzi</i> -positive 17 | 2.88 | 2.29 | 2.18 | 2.80 | 1.90 | 2.00 | 2.19 | 1.98 |
| <i>Trypanosoma cruzi</i> -positive 18 | 1.72 | 1.62 | 1.60 | 1.65 | 1.63 | 1.26 | 1.48 | 1.24 |
| <i>Trypanosoma cruzi</i> -positive 19 | 1.93 | 1.93 | 1.63 | 2.21 | 1.77 | 1.42 | 1.62 | 2.10 |
| <i>Trypanosoma cruzi</i> -positive 20 | 1.18 | 0.93 | 0.93 | 0.81 | 1.11 | 0.75 | 0.66 | 1.44 |
| <i>Trypanosoma cruzi</i> -positive 21 | 2.12 | 1.89 | 1.81 | 2.17 | 1.82 | 1.52 | 0.21 | 0.63 |
| <i>Trypanosoma cruzi</i> -positive 22 | 2.10 | 1.93 | 1.70 | 2.00 | 1.74 | 1.43 | 1.09 | 1.50 |
| <i>Trypanosoma cruzi</i> -positive 23 | 1.29 | 1.24 | 1.24 | 1.25 | 1.45 | 0.93 | 1.05 | 1.46 |
| <i>Trypanosoma cruzi</i> -positive 24 | 1.91 | 1.66 | 1.69 | 1.89 | 1.75 | 1.28 | 1.61 | 0.78 |



|                                       |      |      |      |      |      |      |      |      |
|---------------------------------------|------|------|------|------|------|------|------|------|
| <i>Trypanosoma cruzi</i> -positive 25 | 2.44 | 2.40 | 2.22 | 2.87 | 2.14 | 2.00 | 1.94 | 1.45 |
| <i>Trypanosoma cruzi</i> -positive 26 | 1.96 | 1.91 | 1.81 | 2.11 | 1.87 | 1.44 | 1.27 | 1.32 |
| <i>Trypanosoma cruzi</i> -positive 27 | 3.10 | 2.38 | 2.33 | 3.09 | 2.24 | 2.06 | 2.25 | 2.14 |
| <i>Trypanosoma cruzi</i> -positive 28 | 0.81 | 0.52 | 0.54 | 0.48 | 1.06 | 0.43 | 0.31 | 0.35 |
| <i>Trypanosoma cruzi</i> -positive 29 | 2.06 | 2.06 | 1.92 | 2.09 | 1.94 | 1.54 | 1.65 | 1.69 |
| <i>Trypanosoma cruzi</i> -positive 30 | 1.77 | 1.53 | 1.46 | 1.62 | 1.87 | 1.18 | 1.54 | 1.17 |
| <i>Trypanosoma cruzi</i> -positive 31 | 3.20 | 2.60 | 2.36 | 3.08 | 2.41 | 2.12 | 2.43 | 2.25 |
| <i>Trypanosoma cruzi</i> -positive 32 | 1.31 | 1.34 | 1.26 | 1.21 | 1.88 | 0.87 | 0.90 | 0.89 |
| <i>Trypanosoma cruzi</i> -positive 33 | 1.98 | 1.86 | 1.79 | 2.02 | 2.11 | 1.38 | 1.90 | 1.43 |
| <i>Trypanosoma cruzi</i> -positive 34 | 2.49 | 2.30 | 2.31 | 2.55 | 2.35 | 1.73 | 2.10 | 1.80 |
| <i>Trypanosoma cruzi</i> -positive 35 | 2.75 | 2.55 | 2.34 | 2.97 | 2.48 | 1.99 | 2.23 | 2.11 |
| <i>Trypanosoma cruzi</i> -positive 36 | 0.85 | 0.34 | 0.32 | 0.31 | 1.46 | 0.29 | 0.27 | 0.25 |
| <i>Trypanosoma cruzi</i> -positive 37 | 3.55 | 2.92 | 2.67 | 3.64 | 2.79 | 2.48 | 3.10 | 2.70 |
| <i>Trypanosoma cruzi</i> -positive 38 | 2.99 | 2.71 | 2.48 | 3.11 | 2.54 | 2.19 | 1.66 | 2.07 |
| <i>Trypanosoma cruzi</i> -positive 39 | 0.79 | 0.57 | 0.60 | 0.55 | 1.62 | 0.52 | 0.35 | 0.47 |
| <i>Trypanosoma cruzi</i> -positive 40 | 2.41 | 2.22 | 2.07 | 2.64 | 2.54 | 1.76 | 1.87 | 1.93 |
| <i>Trypanosoma cruzi</i> -positive 41 | 2.88 | 2.69 | 2.41 | 3.13 | 2.59 | 2.11 | 2.52 | 2.19 |
| <i>Trypanosoma cruzi</i> -positive 42 | 2.13 | 2.10 | 1.83 | 2.04 | 2.38 | 1.50 | 1.94 | 1.65 |
| <i>Trypanosoma cruzi</i> -positive 43 | 1.31 | 1.40 | 1.28 | 1.45 | 2.11 | 0.97 | 0.86 | 0.87 |
| <i>Trypanosoma cruzi</i> -positive 44 | 2.19 | 1.78 | 1.75 | 2.35 | 2.52 | 1.51 | 1.60 | 1.59 |
| <i>Trypanosoma cruzi</i> -positive 45 | 2.07 | 1.86 | 1.77 | 2.40 | 2.53 | 1.48 | 1.73 | 1.59 |
| <i>Trypanosoma cruzi</i> -positive 46 | 2.85 | 2.16 | 2.17 | 2.86 | 2.80 | 1.87 | 2.38 | 2.04 |

### Indirect ELISA – IBMP-8.4

| Samples                               | IBMP-8.4                |      |      |      |      |      |      |      |
|---------------------------------------|-------------------------|------|------|------|------|------|------|------|
|                                       | Time of exposure (DAYS) |      |      |      |      |      |      |      |
|                                       | 0                       | 52   | 104  | 156  | 206  | 260  | 312  | 364  |
| <i>Trypanosoma cruzi</i> -negative 01 | 0.33                    | 0.30 | 0.26 | 0.30 | 0.20 | 0.22 | 0.45 | 0.30 |
| <i>Trypanosoma cruzi</i> -negative 02 | 0.79                    | 0.37 | 0.34 | 0.37 | 0.25 | 0.35 | 0.40 | 0.34 |
| <i>Trypanosoma cruzi</i> -negative 03 | 0.31                    | 0.27 | 0.26 | 0.27 | 0.25 | 0.26 | 0.74 | 0.24 |
| <i>Trypanosoma cruzi</i> -negative 04 | 0.37                    | 0.32 | 0.35 | 0.32 | 0.31 | 0.33 | 0.37 | 0.36 |
| <i>Trypanosoma cruzi</i> -negative 05 | 0.33                    | 0.29 | 0.33 | 0.29 | 0.27 | 0.24 | 0.50 | 0.54 |
| <i>Trypanosoma cruzi</i> -negative 06 | 0.46                    | 0.43 | 0.34 | 0.43 | 0.30 | 0.36 | 0.60 | 0.32 |
| <i>Trypanosoma cruzi</i> -negative 07 | 0.32                    | 0.30 | 0.30 | 0.30 | 0.33 | 0.27 | 0.36 | 0.47 |
| <i>Trypanosoma cruzi</i> -negative 08 | 0.34                    | 0.31 | 0.33 | 0.31 | 0.29 | 0.34 | 0.55 | 0.56 |
| <i>Trypanosoma cruzi</i> -negative 09 | 0.24                    | 0.34 | 0.20 | 0.34 | 0.34 | 0.23 | 0.34 | 0.37 |
| <i>Trypanosoma cruzi</i> -negative 10 | 0.38                    | 0.39 | 0.32 | 0.39 | 0.31 | 0.32 | 0.51 | 0.57 |
| <i>Trypanosoma cruzi</i> -negative 11 | 0.45                    | 0.38 | 0.26 | 0.38 | 0.29 | 0.21 | 0.61 | 0.25 |
| <i>Trypanosoma cruzi</i> -negative 12 | 0.68                    | 0.42 | 0.34 | 0.42 | 0.29 | 0.36 | 0.70 | 0.31 |
| <i>Trypanosoma cruzi</i> -negative 13 | 0.41                    | 0.50 | 0.32 | 0.50 | 0.32 | 0.32 | 0.63 | 0.32 |
| <i>Trypanosoma cruzi</i> -negative 14 | 0.28                    | 0.25 | 0.20 | 0.25 | 0.30 | 0.23 | 0.19 | 0.47 |
| <i>Trypanosoma cruzi</i> -negative 15 | 0.42                    | 0.35 | 0.07 | 0.35 | 0.33 | 0.31 | 0.58 | 0.28 |
| <i>Trypanosoma cruzi</i> -negative 16 | 0.55                    | 0.34 | 0.28 | 0.34 | 0.39 | 0.31 | 0.25 | 0.47 |
| <i>Trypanosoma cruzi</i> -negative 17 | 0.77                    | 0.72 | 0.58 | 0.62 | 0.36 | 0.54 | 0.74 | 0.57 |
| <i>Trypanosoma cruzi</i> -negative 18 | 0.36                    | 0.31 | 0.31 | 0.31 | 0.31 | 0.29 | 0.46 | 0.30 |

|                                       |      |      |      |      |      |      |      |      |
|---------------------------------------|------|------|------|------|------|------|------|------|
| <i>Trypanosoma cruzi</i> -negative 19 | 0.33 | 0.28 | 0.25 | 0.28 | 0.31 | 0.27 | 0.61 | 0.51 |
| <i>Trypanosoma cruzi</i> -negative 20 | 0.43 | 0.31 | 0.30 | 0.31 | 0.30 | 0.28 | 0.36 | 0.30 |
| <i>Trypanosoma cruzi</i> -negative 21 | 0.80 | 0.44 | 0.35 | 0.44 | 0.35 | 0.35 | 0.54 | 0.58 |
| <i>Trypanosoma cruzi</i> -negative 22 | 0.39 | 0.41 | 0.47 | 0.41 | 0.30 | 0.30 | 0.55 | 0.34 |
| <i>Trypanosoma cruzi</i> -negative 23 | 0.47 | 0.42 | 0.54 | 0.42 | 0.31 | 0.37 | 0.42 | 0.33 |
| <i>Trypanosoma cruzi</i> -negative 24 | 0.30 | 0.31 | 0.26 | 0.31 | 0.43 | 0.24 | 0.27 | 0.21 |
| <i>Trypanosoma cruzi</i> -negative 25 | 0.63 | 0.32 | 0.33 | 0.32 | 0.34 | 0.26 | 0.40 | 0.28 |
| <i>Trypanosoma cruzi</i> -negative 26 | 0.25 | 0.27 | 0.22 | 0.27 | 0.35 | 0.21 | 0.30 | 0.41 |
| <i>Trypanosoma cruzi</i> -negative 27 | 0.36 | 0.32 | 0.50 | 0.32 | 0.34 | 0.31 | 0.42 | 0.31 |
| <i>Trypanosoma cruzi</i> -negative 28 | 0.29 | 0.30 | 0.30 | 0.30 | 0.26 | 0.26 | 0.30 | 0.23 |
| <i>Trypanosoma cruzi</i> -negative 29 | 0.38 | 0.30 | 0.34 | 0.30 | 0.31 | 0.28 | 0.48 | 0.28 |
| <i>Trypanosoma cruzi</i> -negative 30 | 0.46 | 0.41 | 0.37 | 0.41 | 0.28 | 0.35 | 0.51 | 0.40 |
| <i>Trypanosoma cruzi</i> -negative 31 | 0.19 | 0.18 | 0.16 | 0.18 | 0.26 | 0.71 | 0.29 | 0.15 |
| <i>Trypanosoma cruzi</i> -negative 32 | 0.47 | 0.38 | 0.34 | 0.38 | 0.34 | 0.31 | 0.50 | 0.32 |
| <i>Trypanosoma cruzi</i> -negative 33 | 0.28 | 0.22 | 0.21 | 0.22 | 0.31 | 0.20 | 0.39 | 0.20 |
| <i>Trypanosoma cruzi</i> -negative 34 | 0.76 | 0.86 | 0.66 | 0.56 | 0.37 | 0.59 | 0.80 | 0.78 |
| <i>Trypanosoma cruzi</i> -negative 35 | 0.51 | 0.48 | 0.42 | 0.48 | 0.37 | 0.36 | 0.54 | 0.43 |
| <i>Trypanosoma cruzi</i> -negative 36 | 0.42 | 0.35 | 0.44 | 0.35 | 0.33 | 0.27 | 0.53 | 0.30 |
| <i>Trypanosoma cruzi</i> -negative 37 | 0.32 | 0.29 | 0.25 | 0.29 | 0.25 | 0.24 | 0.38 | 0.44 |
| <i>Trypanosoma cruzi</i> -negative 38 | 0.53 | 0.43 | 0.35 | 0.43 | 0.49 | 0.34 | 0.54 | 0.30 |
| <i>Trypanosoma cruzi</i> -negative 39 | 0.29 | 0.26 | 0.28 | 0.26 | 0.32 | 0.25 | 0.49 | 0.25 |
| <i>Trypanosoma cruzi</i> -negative 40 | 0.31 | 0.35 | 0.29 | 0.35 | 0.48 | 0.27 | 0.52 | 0.34 |
| <i>Trypanosoma cruzi</i> -negative 41 | 0.41 | 0.36 | 0.39 | 0.36 | 0.37 | 0.31 | 0.40 | 0.43 |
| <i>Trypanosoma cruzi</i> -negative 42 | 0.38 | 0.34 | 0.28 | 0.34 | 0.28 | 0.29 | 0.49 | 0.56 |
| <i>Trypanosoma cruzi</i> -negative 43 | 0.40 | 0.36 | 0.31 | 0.36 | 0.35 | 0.26 | 0.41 | 0.30 |

|                                       |      |      |      |      |      |      |      |      |
|---------------------------------------|------|------|------|------|------|------|------|------|
| <i>Trypanosoma cruzi</i> -negative 44 | 0.38 | 0.35 | 0.36 | 0.35 | 0.37 | 0.28 | 0.38 | 0.27 |
| <i>Trypanosoma cruzi</i> -negative 45 | 0.37 | 0.36 | 0.28 | 0.36 | 0.38 | 0.25 | 0.32 | 0.27 |
| <i>Trypanosoma cruzi</i> -negative 46 | 0.25 | 0.27 | 0.23 | 0.27 | 0.54 | 0.21 | 0.43 | 0.48 |
| <i>Trypanosoma cruzi</i> -positive 01 | 2.50 | 2.29 | 2.04 | 2.29 | 1.30 | 1.82 | 2.34 | 2.09 |
| <i>Trypanosoma cruzi</i> -positive 02 | 0.87 | 0.79 | 0.69 | 0.79 | 0.56 | 0.63 | 0.70 | 0.67 |
| <i>Trypanosoma cruzi</i> -positive 03 | 0.99 | 0.38 | 0.35 | 0.38 | 1.10 | 0.33 | 0.43 | 0.29 |
| <i>Trypanosoma cruzi</i> -positive 04 | 2.51 | 2.59 | 2.07 | 2.59 | 1.85 | 1.95 | 2.69 | 2.20 |
| <i>Trypanosoma cruzi</i> -positive 05 | 1.91 | 1.85 | 1.58 | 1.85 | 1.17 | 1.47 | 2.04 | 1.70 |
| <i>Trypanosoma cruzi</i> -positive 06 | 2.34 | 2.15 | 1.80 | 2.15 | 1.52 | 1.69 | 1.74 | 1.75 |
| <i>Trypanosoma cruzi</i> -positive 07 | 1.02 | 0.92 | 0.77 | 0.92 | 0.46 | 0.75 | 0.85 | 0.80 |
| <i>Trypanosoma cruzi</i> -positive 08 | 2.54 | 2.17 | 1.82 | 2.17 | 1.63 | 1.69 | 2.09 | 1.83 |
| <i>Trypanosoma cruzi</i> -positive 09 | 2.64 | 2.51 | 2.05 | 2.51 | 1.62 | 1.87 | 2.37 | 2.19 |
| <i>Trypanosoma cruzi</i> -positive 10 | 1.34 | 1.14 | 0.96 | 1.14 | 1.37 | 0.86 | 1.18 | 0.92 |
| <i>Trypanosoma cruzi</i> -positive 11 | 2.63 | 2.49 | 2.10 | 2.49 | 1.99 | 1.92 | 2.55 | 2.21 |
| <i>Trypanosoma cruzi</i> -positive 12 | 2.24 | 2.20 | 1.86 | 2.20 | 1.72 | 1.68 | 2.21 | 1.83 |
| <i>Trypanosoma cruzi</i> -positive 13 | 2.10 | 2.12 | 1.71 | 2.12 | 1.67 | 1.72 | 2.09 | 1.74 |
| <i>Trypanosoma cruzi</i> -positive 14 | 2.46 | 2.57 | 1.95 | 2.57 | 2.27 | 2.01 | 2.45 | 2.07 |
| <i>Trypanosoma cruzi</i> -positive 15 | 2.75 | 2.69 | 2.11 | 2.69 | 1.74 | 2.31 | 2.99 | 2.42 |
| <i>Trypanosoma cruzi</i> -positive 16 | 2.23 | 2.20 | 1.85 | 2.20 | 2.23 | 0.16 | 2.24 | 1.91 |
| <i>Trypanosoma cruzi</i> -positive 17 | 2.00 | 2.03 | 1.65 | 2.03 | 2.01 | 1.44 | 2.06 | 1.60 |
| <i>Trypanosoma cruzi</i> -positive 18 | 1.81 | 1.71 | 1.58 | 1.71 | 2.01 | 1.32 | 1.84 | 1.48 |
| <i>Trypanosoma cruzi</i> -positive 19 | 1.56 | 1.54 | 1.32 | 1.54 | 1.61 | 1.16 | 1.49 | 2.16 |
| <i>Trypanosoma cruzi</i> -positive 20 | 1.45 | 1.45 | 1.22 | 1.45 | 1.69 | 1.13 | 1.56 | 1.39 |
| <i>Trypanosoma cruzi</i> -positive 21 | 2.25 | 2.05 | 1.78 | 2.05 | 2.19 | 1.86 | 0.18 | 1.14 |
| <i>Trypanosoma cruzi</i> -positive 22 | 2.42 | 2.44 | 1.92 | 2.44 | 1.74 | 1.82 | 1.98 | 1.90 |

|                                       |      |      |      |      |      |      |      |      |
|---------------------------------------|------|------|------|------|------|------|------|------|
| <i>Trypanosoma cruzi</i> -positive 23 | 2.83 | 2.66 | 2.28 | 2.66 | 2.38 | 2.26 | 2.92 | 2.19 |
| <i>Trypanosoma cruzi</i> -positive 24 | 2.86 | 2.86 | 2.33 | 2.86 | 2.54 | 2.39 | 3.00 | 2.40 |
| <i>Trypanosoma cruzi</i> -positive 25 | 2.57 | 2.62 | 2.00 | 2.62 | 1.54 | 2.17 | 2.21 | 2.54 |
| <i>Trypanosoma cruzi</i> -positive 26 | 2.74 | 2.61 | 2.15 | 2.61 | 2.42 | 2.10 | 2.02 | 2.19 |
| <i>Trypanosoma cruzi</i> -positive 27 | 2.87 | 2.71 | 2.19 | 2.71 | 1.45 | 2.24 | 2.81 | 2.33 |
| <i>Trypanosoma cruzi</i> -positive 28 | 1.51 | 1.39 | 1.22 | 1.39 | 1.61 | 1.00 | 1.27 | 1.21 |
| <i>Trypanosoma cruzi</i> -positive 29 | 1.40 | 1.35 | 1.25 | 1.35 | 1.00 | 1.04 | 1.35 | 1.08 |
| <i>Trypanosoma cruzi</i> -positive 30 | 1.56 | 1.69 | 1.30 | 1.69 | 2.30 | 1.00 | 1.33 | 1.20 |
| <i>Trypanosoma cruzi</i> -positive 31 | 2.83 | 2.85 | 2.30 | 2.85 | 1.81 | 2.26 | 3.00 | 2.58 |
| <i>Trypanosoma cruzi</i> -positive 32 | 0.87 | 0.86 | 0.75 | 0.86 | 1.62 | 0.57 | 0.77 | 0.66 |
| <i>Trypanosoma cruzi</i> -positive 33 | 2.69 | 2.47 | 2.09 | 2.47 | 2.38 | 2.06 | 2.70 | 2.20 |
| <i>Trypanosoma cruzi</i> -positive 34 | 2.98 | 2.70 | 2.32 | 2.70 | 2.47 | 2.26 | 2.73 | 2.51 |
| <i>Trypanosoma cruzi</i> -positive 35 | 2.90 | 2.54 | 2.34 | 2.54 | 2.00 | 2.17 | 2.36 | 2.50 |
| <i>Trypanosoma cruzi</i> -positive 36 | 0.84 | 0.50 | 0.41 | 0.50 | 0.95 | 0.28 | 0.62 | 0.40 |
| <i>Trypanosoma cruzi</i> -positive 37 | 3.07 | 3.07 | 2.38 | 3.07 | 2.25 | 2.47 | 3.07 | 2.74 |
| <i>Trypanosoma cruzi</i> -positive 38 | 2.15 | 2.39 | 1.72 | 2.39 | 1.59 | 1.61 | 1.77 | 1.62 |
| <i>Trypanosoma cruzi</i> -positive 39 | 0.89 | 0.59 | 0.57 | 0.59 | 1.13 | 0.53 | 0.69 | 0.48 |
| <i>Trypanosoma cruzi</i> -positive 40 | 1.58 | 1.54 | 1.23 | 1.54 | 1.70 | 1.31 | 1.66 | 1.51 |
| <i>Trypanosoma cruzi</i> -positive 41 | 2.86 | 2.61 | 2.14 | 2.61 | 2.37 | 2.25 | 2.64 | 2.46 |
| <i>Trypanosoma cruzi</i> -positive 42 | 3.03 | 2.72 | 2.31 | 2.72 | 2.15 | 2.23 | 3.19 | 2.51 |
| <i>Trypanosoma cruzi</i> -positive 43 | 1.36 | 1.38 | 1.16 | 1.38 | 2.21 | 0.90 | 1.19 | 1.95 |
| <i>Trypanosoma cruzi</i> -positive 44 | 2.37 | 2.31 | 1.87 | 2.31 | 2.12 | 1.89 | 2.49 | 2.10 |
| <i>Trypanosoma cruzi</i> -positive 45 | 2.01 | 2.00 | 1.65 | 2.00 | 2.30 | 1.44 | 1.99 | 1.66 |
| <i>Trypanosoma cruzi</i> -positive 46 | 2.19 | 2.25 | 1.79 | 2.25 | 2.47 | 1.43 | 2.36 | 1.72 |
